# Supplementary material for: Stereoselective synthesis of glycosides using (salen)Co catalysts as promoters
Source: Royal Society of Chemistry journal article supplement (doi:10.1039/c5cc02552d), 2015-01-01

**Stereoselective synthesis of glycosides using (salen)Co catalysts as promoters.**

Sandra Medina, Alexander S. Henderson,<sup>a</sup> John F. Bower<sup>a</sup> and M. Carmen Galan<sup>a\*</sup>

## Table of contents

|                                            |    |
|--------------------------------------------|----|
| Experimental procedures.....               | S2 |
| Synthesis and activation of catalysts..... | S2 |
| General glycosylation procedure.....       | S2 |
| Glycosylated products.....                 | S3 |
| References.....                            | S8 |
| Spectra.....                               | S9 |

## Experimental Procedures

### General.

Chemicals were purchased and used without further purification. Anhydrous solvents were obtained by passage through a column of anhydrous alumina using equipment from Anhydrous Engineering (University of Bristol) based on the Grubbs' design. Reactions requiring anhydrous conditions were performed under N<sub>2</sub>; glassware and needles were either flame dried immediately prior to use or placed in an oven (150 °C) for at least 2 h and allowed to cool either in desiccators or under reduced pressure; liquid reagents, solutions or solvents were added via syringe through rubber septa. Reactions were monitored by TLC on Kieselgel 60 F254 (Merck). Detection was by examination under UV light (254 nm) and by charring with 10% H<sub>2</sub>SO<sub>4</sub> in EtOH. Flash column chromatography (FCC) was performed using silica gel [Merck, 230–400 mesh (40–63 µm)]. Extracts were concentrated *in vacuo* using both a rotary evaporator (bath temperatures up to 40 °C) at a pressure of either 15 mmHg (diaphragm pump) or 0.1 mmHg (oil pump), as appropriate, and a high vacuum line at room temperature. <sup>1</sup>H and <sup>13</sup>C NMR spectra were measured in the solvent stated at 400 or 500 MHz and 101 or 126 MHz respectively. <sup>1</sup>H and <sup>13</sup>C NMR chemical shifts are quoted in parts per million (ppm) and referenced to the residual solvent peak (CDCl<sub>3</sub>: <sup>1</sup>H = 7.26 ppm and <sup>13</sup>C = 77.2 ppm), coupling constants (*J*) are given in Hertz (Hz). Multiplicities are abbreviated as: br (broad), s (singlet), d (doublet), t (triplet), q (quartet) and m (multiplet) or combinations thereof. Assignments were made, where necessary, with the aid of COSY, HSQC and HMBC NMR experiments. For α/β mixtures only peaks that can clearly be assigned have been reported.

### Synthesis and activation of Catalysts.

Catalysts **1a-c** were activated following the reported procedure by Jacobsen *et al.*<sup>1</sup> Catalysts **2a-2d** were prepared following the reported synthesis the same group.<sup>2</sup>

### General glycosylation procedure.

Trichloroacetimidate glycosyl donor (1.2 eq.), acceptor (1.0 eq.) and catalyst (0.1 eq.) were weighed into a round bottom flask and then put under vacuum for 1 h. The flask was then filled with N<sub>2</sub>, followed by the addition of anhydrous solvent (0.1 M). The solution was then stirred at room temperature for the times stated in tables 1, 2 and 3. Once the TLC showed complete consumption of starting materials, the reaction mixture was quenched by filtering through a pad of Celite®, washed with additional solvent (5 mL) and concentrated *in vacuo*. All reactions were purified by FCC.

**Methyl (2,3,4,6-tetra-*O*-benzyl- $\alpha/\beta$ -D-glucopyranosyl)-(1 $\rightarrow$ 6)-2,3,4-tri-*O*-benzyl- $\alpha$ -D-glucopyranoside 5a:**

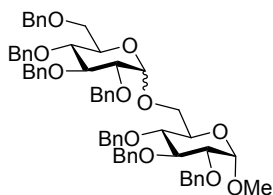

Following the general glycosylation procedure, trichloroacetimidate donor **3** (50 mg, 73  $\mu$ mol) and monosaccharide acceptor **4a** (28 mg, 61  $\mu$ mol) were reacted in the presence of catalyst **2d** (8 mg, 6  $\mu$ mol) in 0.6 mL of anhydrous acetonitrile at room temperature for 1 hour to give, after purification on FCC on silica gel (*n*-Hexane:EtOAc/9:1), the desired glycosylated product **5a** (55 mg, 56  $\mu$ mol) in 92% yield as a mixture of anomers ( $\alpha$ : $\beta$  = 1:4), as determined by  $^1\text{H}$  and  $^{13}\text{C}$  NMR. The spectroscopic data was in agreement with previously reported data.<sup>3</sup>

**Butyl 2,3,4,6-tetra-*O*-benzyl- $\alpha/\beta$ -D-glucopyranoside 5b:**

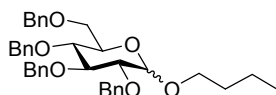

Following the general glycosylation procedure, trichloroacetimidate donor **3** (50 mg, 0.073 mmol) and acceptor **4b** (5.6  $\mu$ l, 61  $\mu$ mol) were reacted in the presence of catalyst **2d** (8 mg, 6  $\mu$ mol) in 0.6 mL of anhydrous acetonitrile at room temperature for 1 hour to give, after purification on FCC on silica gel (*n*-Hexane:EtOAc/20:1), the desired glycosylated product **5b** (32 mg, 0.054 mmol) as a pale yellow solid in 88% yield as a mixture of anomers ( $\alpha$ : $\beta$  = 1:4.9), as determined by  $^1\text{H}$  NMR and  $^{13}\text{C}$  NMR. The spectroscopic data was in agreement with previously reported data.<sup>4</sup>

**Isobutyl 2,3,4,6-tetra-*O*-benzyl- $\alpha/\beta$ -D-glucopyranoside 5c:**

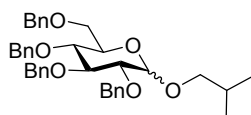

Following the general glycosylation procedure, trichloroacetimidate donor **3** (50 mg, 73  $\mu$ mol) and acceptor **4c** (5.6  $\mu$ l, 61  $\mu$ mol) were reacted in the presence of catalyst **2d** (8 mg, 6  $\mu$ mol) in 0.6 mL of anhydrous acetonitrile at room temperature for 1 hour to give, after purification on FCC on silica gel (*n*-Hexane:EtOAc/20:1) the desired glycosylated product **5c** (29 mg, 0.048 mmol) as a pale yellow oil in 78% yield as a mixture of anomers ( $\alpha$ : $\beta$  = 1:5.3), as determined by  $^1\text{H}$  NMR and  $^{13}\text{C}$  NMR.  **$\alpha$ : $\beta$  mixture:**  $^1\text{H}$  NMR (400 MHz, Chloroform-*d*)  $\delta$  7.40 – 7.22 (m, 25H, Ar), 7.17-7.13 (m, 3H, Ar), 5.01 – 4.92 (m, 3H,  $\text{CH}_2\text{Ph}$ ), 4.85 – 4.71 (m, 5H,  $\text{CH}_2\text{Ph}$ ), 4.75 (d,  $J$  = 3.3 Hz, 1H, H-1 $\alpha$ ), 4.67 – 4.46 (m, 5H,  $\text{CH}_2\text{Ph}$ ), 4.39 (d,  $J$  = 7.8 Hz, 1H, H-1 $\beta$ ), 3.99 (t,  $J$  = 9.3 Hz, 1H, H3 $\alpha$ ), 3.81 – 3.60 (m, 7H, H-6a $\beta$ , -OCH $_2$ CH(CH $_3$ ) $_2$ , H-3 $\beta$ , H-4 $\beta$ ), 3.49 – 3.44 (m, 2H, H-2 $\beta$  and H-5 $\beta$ ), 3.39 (dd,  $J$  = 9.5, 7.3 Hz, 1H, H-6a $\alpha$ ), 3.28 (dd,  $J_1$  = 9.3 Hz,  $J_2$  = 7.1 Hz, 1H, H-6b $\beta$ ), 3.18 (dd,  $J_1$  = 9.5 Hz,  $J_2$  = 6.3 Hz, 1H, H-6b $\alpha$ ), 2.08 – 1.92 (m, 2H, -OCH $_2$ CH(CH $_3$ ) $_2$ ), 1.00 – 0.93 (m, 8H, -OCH $_2$ CH(CH $_3$ ) $_2$ ).  $^{13}\text{C}$  NMR (101 MHz, Chloroform-*d*)  $\delta$  138.9, 138.6, 138.5, 138.4, 138.3, 138.2, 138.1, 138.0, 128.4, 128.3, 128.3, 128.2, 128.0, 128.0, 127.9, 127.9, 127.8, 127.7, 127.7, 127.6, 127.6, 127.5, 127.5, 103.8 (C-1 $\beta$  anomer), 97.1 (C-1 $\alpha$  anomer),

84.7, 82.3, 82.1, 80.2, 78.0, 78.0, 76.7, 75.7, 75.0, 75.0, 75.0, 74.8, 73.4, 73.0, 70.1, 69.0, 28.6, 28.2, 19.6, 19.6, 19.4, 19.4. IR (film)  $\nu_{\text{max}}/\text{cm}^{-1}$  3675, 2987, 2901, 1406, 1394, 1250, 1066, 1057, 892. ESI- HRMS for  $\text{C}_{38}\text{H}_{44}\text{NaO}_6^+$  ( $\text{M}+\text{Na}^+$ ) calculated: 619.3030; found: 619.3028.

**Cyclohexyl 2,3,4,6-tetra-*O*-benzyl- $\alpha/\beta$ -D-glucopyranoside 5d:**

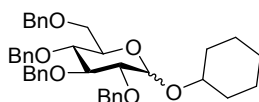

Following the general glycosylation procedure, trichloroacetimidate donor **3** (50 mg, 73  $\mu\text{mol}$ ) and acceptor **4d** (6.4  $\mu\text{L}$ , 61  $\mu\text{mol}$ ) were reacted in the presence of catalyst **2d** (8 mg, 6  $\mu\text{mol}$ ) in 0.6 mL of anhydrous acetonitrile at room temperature for 1 hour to give, after purification on FCC on silica gel (*n*-Hexane:EtOAc/20:1) the desired glycosylated product **5d** (30 mg, 48  $\mu\text{mol}$ ) as a white solid in 78% yield as a mixture of anomers ( $\alpha:\beta = 1:5.3$ ), as determined by  $^1\text{H}$  NMR and  $^{13}\text{C}$  NMR. The spectroscopic data was in agreement with previously reported data.<sup>5</sup>

**Phenyl *O*-(2,3,4,6-tetra-*O*-benzyl- $\alpha$ -D-glucopyranosyl)-(1->6)-2,3,4-tri-*O*-benzoyl-1-thio- $\beta$ -D-glucopyranoside 5e:**

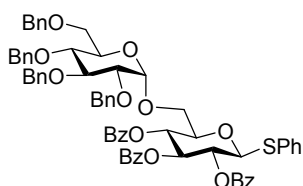

Following the general glycosylation procedure, trichloroacetimidate donor **3** (50 mg, 73  $\mu\text{mol}$ ) and monosaccharide acceptor **4e** (36 mg, 61  $\mu\text{mol}$ ) were reacted in the presence of catalyst **2d** (8 mg, 6  $\mu\text{mol}$ ) in 0.6 mL of anhydrous acetonitrile at room temperature for 2 hours to give, after purification on FCC on silica gel (*n*-Hexane:EtOAc/4:1) the desired glycosylated product **5e** (50 mg, 0.049 mmol) as a colourless oil in 74% yield as the  $\alpha$  product only, as determined by  $^1\text{H}$  and  $^{13}\text{C}$  NMR. The spectroscopic data was in agreement with previously reported data.<sup>6</sup>

**2,3,4,6-tetra-*O*-benzyl- $\alpha/\beta$ -D-glucopyranosyl-(1->6)-1,2,3,4-di-*O*-isopropylidene- $\alpha$ -D-galactopyranoside 5f:**

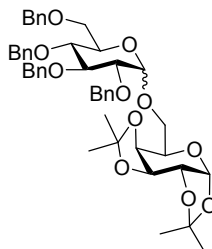

Following the general glycosylation procedure, trichloroacetimidate donor **3** (50 mg, 73  $\mu\text{mol}$ ) and monosaccharide acceptor **4f** (16 mg, 61  $\mu\text{mol}$ ) were reacted in the presence of catalyst **2d** (8 mg, 6

$\mu\text{mol}$ ) in 0.6 mL of anhydrous acetonitrile at room temperature for 2 hours to give, after purification on FCC on silica gel (*n*-Hexane:EtOAc/9:1) the desired glycosylated product **5f** (45 mg, 58  $\mu\text{mol}$ ) as a pale yellow syrup in 94% yield as a mixture of anomers ( $\alpha:\beta = 1:4.3$ ), as determined by  $^1\text{H}$  and  $^{13}\text{C}$  NMR. The spectroscopic data was in agreement with previously reported data.<sup>3</sup>

**Methyl 3-*O*-benzyl-2-*O*-(2,3,4,6-tetra-*O*-benzyl- $\alpha/\beta$ -D-glucopyranosyl)(1 $\rightarrow$ 2)-4,6-*O*-benzylidene- $\alpha$ -D-glucopyranoside 5g:**

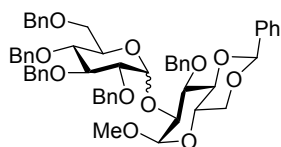

Following the general glycosylation procedure, trichloroacetimidate donor **3** (50 mg, 73  $\mu\text{mol}$ ) and monosaccharide acceptor **4g** (23 mg, 61  $\mu\text{mol}$ ) were reacted in the presence of catalyst **2d** (8 mg, 6  $\mu\text{mol}$ ) in 0.6 mL of anhydrous dichloromethane at room temperature for 2.5 hours to give, after purification on FCC on silica gel (*n*-Hexane:EtOAc/9:1) the desired glycosylated product **5g** (47 mg, 52  $\mu\text{mol}$ ) as a pale yellow oil in 85% yield as a mixture of anomers ( $\alpha:\beta = 9:1$ ), as determined by  $^1\text{H}$  and  $^{13}\text{C}$  NMR. The spectroscopic data was in agreement with previously reported data.<sup>7</sup>

**Butyl 2,3,4,6-tetra-*O*-benzyl- $\alpha/\beta$ -D-galactopyranoside 7:**

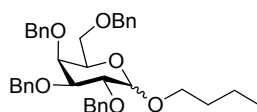

Following the general glycosylation procedure, trichloroacetimidate donor **6a** (50 mg, 73  $\mu\text{mol}$ ) and acceptor **4b** (5.6  $\mu\text{l}$ , 61  $\mu\text{mol}$ ) were reacted in the presence of catalyst **2d** (8 mg, 6  $\mu\text{mol}$ ) in 0.6 mL of anhydrous acetonitrile at room temperature for 30 minutes to give, after purification on FCC on silica gel (*n*-Hexane:EtOAc/20:1) the desired glycosylated product **7** (30 mg, 50  $\mu\text{mol}$ ) as a pale yellow oil in 82% yield as mixture of anomers ( $\alpha:\beta = 1:6$ ) as determined by  $^1\text{H}$  and  $^{13}\text{C}$  NMR. The spectroscopic data was in agreement with previously reported data.<sup>8</sup>

**2,3,4,6-tetra-*O*-benzyl- $\alpha/\beta$ -D-galactopyranosyl-(1 $\rightarrow$ 6)-1,2,3,4-di-*O*-isopropylidene- $\alpha$ -D-galactopyranoside 8:**

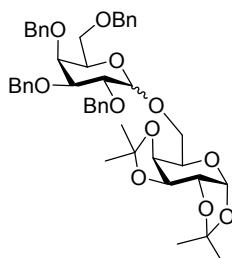

Following the general glycosylation procedure, trichloroacetimidate donor **7a** (50 mg, 73  $\mu\text{mol}$ ) and monosaccharide acceptor **4f** (16 mg, 61  $\mu\text{mol}$ ) were reacted in the presence of catalyst **2d** (8 mg, 6  $\mu\text{mol}$ ) in 0.6 mL of anhydrous acetonitrile at room temperature for 30 minutes to give, after purification on FCC on silica gel (*n*-Hexane:EtOAc/15:1 to 6:1) the desired glycosylated product **8** (30

mg, 38  $\mu\text{mol}$ ) as a pale yellow oil in 62% yield as mixture of anomers ( $\alpha:\beta = 4:1$ ), as determined by  $^1\text{H}$  NMR and  $^{13}\text{C}$  NMR. The spectroscopic data was in agreement with previously reported data.<sup>9</sup>

**Phenyl *O*-(2,3,4,6-tetra-*O*-benzyl- $\alpha$ -D-mannopyranosyl)-(1 $\rightarrow$ 6)-2,3,4-tri-*O*-benzoyl-1-thio- $\beta$ -D-glucopyranoside 9:**

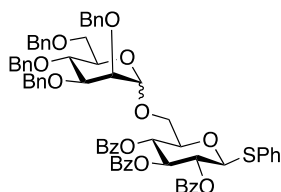

Following the general glycosylation procedure, trichloroacetimidate donor **6b** (50 mg, 73  $\mu\text{mol}$ ) and monosaccharide acceptor **4e** (42 mg, 61  $\mu\text{mol}$ ) were reacted in presence of catalyst **2d** (8 mg, 6  $\mu\text{mol}$ ) in 0.6 mL of anhydrous acetonitrile at room temperature for 2 hours to give, after purification on FCC on silica gel (*n*-Hexane:EtOAc/15:1 to 9:1) the desired glycosylated product **9** as a mixture of anomers ( $\alpha:\beta = 7.2:1$ ), (40 mg, 36  $\mu\text{mol}$ , 60%) as a pale yellow oil as determined by  $^1\text{H}$  and  $^{13}\text{C}$  NMR.  **$\alpha$  anomer.**  $^1\text{H}$  NMR (400 MHz, Chloroform-*d*)  $\delta$  8.00 – 7.94 (m, 2H, Ar), 7.85 (dd,  $J = 8.3, 1.4$  Hz, 2H, Ar), 7.81 – 7.76 (m, 2H, Ar), 7.55 – 7.20 (m, 34H, Ar), 7.18-7.13 (m, 2H, Ar), 5.84 (t,  $J = 9.6$  Hz, 1H), 5.53-5.48 (m, 1H), 4.96 (d,  $J = 10.0$  Hz, 1H, H-1 $\beta$ ), 4.91 (d,  $J = 1.8$  Hz, 1H, H-1' $\alpha$ ), 4.84 (d,  $J = 10.9$  Hz, 1H,  $\text{CH}_2\text{Ph}$ ), 4.68 (d,  $J = 2.2$  Hz, 2H,  $\text{CH}_2\text{Ph}$ ), 4.57 (d,  $J = 12.1$  Hz, 1H,  $\text{CH}_2\text{Ph}$ ), 4.49 – 4.37 (m, 4H,  $\text{CH}_2\text{Ph}$ ), 3.98 – 3.88 (m, 3H), 3.81 (dd,  $J = 9.4, 3.1$  Hz, 1H), 3.72 – 3.56 (m, 5H).  $^{13}\text{C}$  NMR (126 MHz, Chloroform-*d*)  $\delta$  165.8, 165.1, 165.0, 138.7, 138.6, 138.4, 138.4, 133.3, 133.2, 133.1, 131.9, 129.9, 129.9, 129.8, 129.7, 129.2, 129.1, 129.0, 129.0, 128.9, 128.5, 128.5, 128.4, 128.4, 128.3, 128.3, 128.3, 128.3, 128.2, 128.2, 127.9, 127.7, 127.7, 127.5, 127.4, 127.4, 98.4 (C1- $\alpha$  anomer), 86.5 (C1'- $\beta$  anomer), 80.1, 76.9, 74.9, 74.7, 74.7, 74.2, 73.2, 72.5, 72.1, 71.9, 70.6, 69.8, 69.1, 66.8. IR (film)  $\nu_{\text{max}}/\text{cm}^{-1}$  1733, 1601, 1449, 1279, 1260, 1090, 1066, 1023, 711. ESI-HRMS for  $\text{C}_{67}\text{H}_{62}\text{NaO}_{13}\text{S}^+$  (MNa $^+$ ) calculated: 1129.3803; found: 1129.3825.  $[\alpha]_D^{23} = 42$  (c 0.012, Dichloromethane).

**2,3,4,6-tetra-*O*-benzyl- $\alpha/\beta$ -D-mannopyranosyl-(1 $\rightarrow$ 6)-1,2,3,4-di-*O*-isopropylidene- $\alpha$ -D-galactopyranoside 10:**

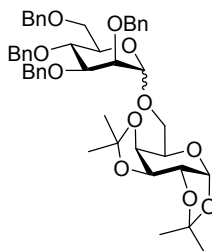

Following the general glycosylation procedure, trichloroacetimidate donor **6b** (50 mg, 73  $\mu\text{mol}$ ) and monosaccharide acceptor **4f** (28 mg, 61  $\mu\text{mol}$ ) were reacted in the presence of catalyst **2d** (8 mg, 6  $\mu\text{mol}$ ) in 0.6 mL of anhydrous acetonitrile at room temperature for 30 minutes to give, after purification on FCC on silica gel (*n*-Hexane:EtOAc/9:1) the desired glycosylated product **10** (26 mg, 56  $\mu\text{mol}$ , 92% yield) as a mixture of anomers ( $\alpha:\beta = 1:4$ ) as determined by  $^1\text{H}$  and  $^{13}\text{C}$  NMR. The spectroscopic data was in agreement with previously reported data.<sup>3</sup>

**Methyl**  
**glucopyranoside 11:**

***O*-(2,3,4,6-tetra-*O*-acetyl- $\beta$ -D-glucopyranosyl)-(1 $\rightarrow$ 6)-2,3,4-tri-*O*-benzyl- $\alpha$ -D-**

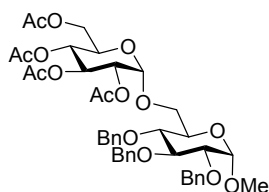

Following the general glycosylation procedure, trichloroacetimidate donor **6c** (100 mg, 204  $\mu$ mol) and monosaccharide acceptor **4a** (39 mg, 85  $\mu$ mol) were reacted in presence of catalyst **2d** (12 mg, 9  $\mu$ mol) in 1.0 mL of anhydrous dichloromethane at room temperature for 24 hours (an extra aliquot of 50 mg of trichloroacetimidate was added after 8 hours stirring) to afford, after FCC on silica gel (Toluene:Acetone/20:1), the desired glycosylated product **11** (33 mg, 42  $\mu$ mol, 50% yield) as a  $\beta$  only as a pale yellow oil as determined by  $^1\text{H}$  and  $^{13}\text{C}$  NMR. The spectroscopic data was in agreement with previously reported data.<sup>10</sup>

**2,3,4,6-tetra-*O*-acetyl- $\beta$ -D-glucopyranosyl-(1 $\rightarrow$ 6)-1,2,3,4-di-*O*-isopropylidene- $\alpha$ -D-**  
**galactopyranoside 12:**

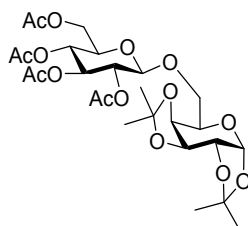

Following the general glycosylation procedure, trichloroacetimidate donor **6c** (100 mg, 204  $\mu$ mol) and monosaccharide acceptor **4f** (44 mg, 169  $\mu$ mol) were reacted in presence of catalyst **2d** (22 mg, 17  $\mu$ mol) in 1.7 mL of anhydrous dichloromethane at room temperature for 24 hours to give, after purification on FCC on silica gel (*n*-Hexane:EtOAc/4:1) the desired glycosylated product **12** (52 mg, 87  $\mu$ mol, 52% yield) as a  $\beta$  only as a pale yellow oil as determined by  $^1\text{H}$  and  $^{13}\text{C}$  NMR. The spectroscopic data was in agreement with previously reported data.<sup>11</sup>

**Methyl**    ***O*-(2,3,4-tri-*O*-acetyl- $\alpha/\beta$ -L-fucopyranosyl)-(1 $\rightarrow$ 6)-2,3,4-tri-*O*-benzyl- $\alpha$ -D-glucopyranoside**  
**13:**

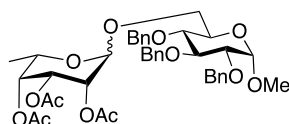

Following the general glycosylation procedure, trichloroacetimidate donor **6e** (100 mg, 344  $\mu$ mol) and monosaccharide acceptor **4a** (67 mg, 143  $\mu$ mol) were reacted in presence of catalyst **2d** (18 mg, 14  $\mu$ mol) in 1.5 mL of anhydrous dichloromethane at room temperature for 3 hours (3 aliquots of 50 mg of trichloroacetimidate were added until not more acceptor was left) to give, after purification on FCC on silica gel (*n*-Hexane:EtOAc/5:1 to 3:1) the desired glycosylated product **13** (87 mg, 118  $\mu$ mol, 83% yield) as a separable mixture of anomers ( $\alpha:\beta$  = 1:4.9) as determined by  $^1\text{H}$  and  $^{13}\text{C}$  NMR.



**$\alpha$  anomer.**  $^1\text{H}$  NMR (400 MHz, Chloroform- $d$ )  $\delta$  7.35 – 7.25 (m, 15H, Ar), 5.74 (d,  $J$  = 5.0 Hz, 1H, H-1'), 5.23 (dd,  $J$  = 3.4, 1.9 Hz, 1H, H-2), 5.00 (dd,  $J$  = 7.2, 3.4 Hz, 1H, H-3'), 4.98 (d,  $J$  = 10.9 Hz, 1H,  $\text{CH}_2\text{Ph}$ ), 4.88 (d,  $J$  = 10.9 Hz, 1H,  $\text{CH}_2\text{Ph}$ ), 4.81 (d,  $J$  = 11.0 Hz, 1H,  $\text{CH}_2\text{Ph}$ ), 4.77 (d,  $J$  = 12.7 Hz, 1H,  $\text{CH}_2\text{Ph}$ ), 4.66 – 4.59 (m, 2H, 2x  $\text{CH}_2\text{Ph}$ ), 4.60 (d,  $J$  = 3.64 Hz, 1H, H-1), 4.22 – 4.19 (m, 2H, H-2'), 3.97 (t,  $J$  = 9.2 Hz, 1H, H-4), 3.73 – 3.67 (m, 3H, H-6a, H-6b and H-3), 3.55 – 3.48 (m, 2H, H-5 and H-5'), 3.35 (s, 3H, OMe), 2.12 (s, 3H, OAc), 2.03 (s, 3H, OAc), 1.65 (s, 3H, OAc), 1.17 (d,  $J$  = 6.6 Hz, 3H,  $\text{CH}_3$ ).  $^{13}\text{C}$  NMR (126 MHz, Chloroform- $d$ )  $\delta$  170.2, 170.1, 138.7, 138.4, 138.1, 128.5, 128.5, 128.5, 128.4, 128.4, 128.4, 128.1, 128.1, 128.1, 128.0, 127.9, 127.9, 127.7, 127.6, 98.0 (C-1), 97.8 (C-1'), 82.1 (C-4), 79.9, 77.6, 75.8, 74.9, 73.4, 73.4, 72.1 (C-3'), 69.4 (C-3), 68.9 (C-2), 67.3, 61.4 (C-6), 55.1, 29.7, 24.3, 20.8, 20.6, 16.1. IR (film)  $\nu_{\text{max}}/\text{cm}^{-1}$  2928, 1747, 1369, 1220, 1072, 1021, 911, 736, 698. ESI-HRMS for  $\text{C}_{40}\text{H}_{48}\text{NaO}_{13}^+$  ( $\text{MNa}^+$ ) calculated: 759.2987; found: 759.2987.  $[\alpha]_D^{23} = -4$  (c 0.007, Dichloromethane).

**$\beta$  anomer.**  $^1\text{H}$  NMR (400 MHz, Chloroform- $d$ )  $\delta$  7.35 – 7.24 (m, 15H, Ar), 5.21 – 5.16 (m, 2H, H-2 and H-2'), 5.00 (dd,  $J$  = 10.6, 3.5 Hz, 1H, H-3'), 4.96 (d,  $J$  = 11.1 Hz, 1H,  $\text{CH}_2\text{Ph}$ ), 4.84 – 4.75 (m, 3H,  $\text{CH}_2\text{Ph}$ ), 4.68 – 4.55 (m, 4H,  $\text{CH}_2\text{Ph}$ , H-1 and H-1'), 4.11 – 4.05 (m, 1H, H-6a), 3.95 (t,  $J$  = 9.3 Hz, 1H, H-4), 3.68 – 3.66 (m, 3H, H-5, H-5' and H-6b), 3.49 (t,  $J$  = 9.4 Hz, 1H, H-3), 3.43 (dd,  $J$  = 9.6, 3.5 Hz, 1H, H-4'), 3.35 (s, 3H, OMe), 2.13 (s, 3H, OAc), 1.97 (s, 3H, OAc), 1.94 (s, 3H, OAc), 1.19 (d,  $J$  = 6.4 Hz, 3H,  $\text{CH}_3$ ).  $^{13}\text{C}$  NMR (126 MHz, Chloroform- $d$ )  $\delta$  170.7, 170.3, 169.4, 138.91, 38.3, 138.1, 128.5, 128.4, 128.4, 128.3, 128.3, 128.1, 128.1, 128.0, 128.0, 127.9, 127.9, 127.7, 127.7, 127.5, 101.1 (C-1'), 98.0 (C-1), 81.8 (C-4), 79.8 (C-4'), 77.6 (C-3), 75.6, 75.1, 73.2, 71.3 (C-3'), 70.3, 70.3, 69.1, 69.0, 67.3 (C-6), 55.1, 20.8, 20.7, 20.6. IR (film)  $\nu_{\text{max}}/\text{cm}^{-1}$  2928, 1747, 1369, 1220, 1072, 1021, 911, 736, 698. IR (film)  $\nu_{\text{max}}/\text{cm}^{-1}$  2936, 2251, 1747, 1368, 1219, 1054, 1027, 909, 729, 697. ESI-HRMS for  $\text{C}_{40}\text{H}_{48}\text{NaO}_{13}^+$  ( $\text{MNa}^+$ ) calculated: 759.2987; found: 759.2987.  $[\alpha]_D^{23} = 7$  (c 0.029, Dichloromethane).

## References

- (1) Tokunaga, M.; Larrow, J. F.; Kakiuchi, F.; Jacobsen, E. N. *Science* **1997**, *277*, 936.
- (2) White, D. E.; Jacobsen, E. N. *Tetrahedron-Asymmetry* **2003**, *14*, 3633.
- (3) Kim, K. S.; Fulse, D. B.; Baek, J. Y.; Lee, B. Y.; Jeon, H. B. *J Am Chem Soc* **2008**, *130*, 8537.
- (4) Hoang, K. L. M.; Bai, Y.; Ge, X.; Liu, X. W. *J Org Chem* **2013**, *78*, 5196.
- (5) Imagawa, H.; Kinoshita, A.; Fukuyama, T.; Yamamoto, H.; Nishizawa, M. *Tetrahedron Lett* **2006**, *47*, 4729.
- (6) He, H. W.; Zhu, X. M. *Org Lett* **2014**, *16*, 3102.
- (7) Nagai, H.; Sasaki, K.; Matsumura, S.; Toshima, K. *Carbohydr Res* **2005**, *340*, 337.
- (8) Mattson, A. L.; Michel, A. K.; Cloninger, M. J. *Carbohydr Res* **2012**, *347*, 142.
- (9) Kumar, V.; Taxak, N.; Jangir, R.; Bharatam, P. V.; Kartha, K. P. R. *J Org Chem* **2014**, *79*, 3427.
- (10) Xiong, D. C.; Yang, A. Q.; Yu, Y.; Ye, X. S. *Tetrahedron Lett* **2015**, *56*, 211.
- (11) Mukherjee, D.; Ray, P. K.; Chowdhury, U. S. *Tetrahedron* **2001**, *57*, 7701.

sv99780\_SMV136A-MeCN\_PROTON\_01

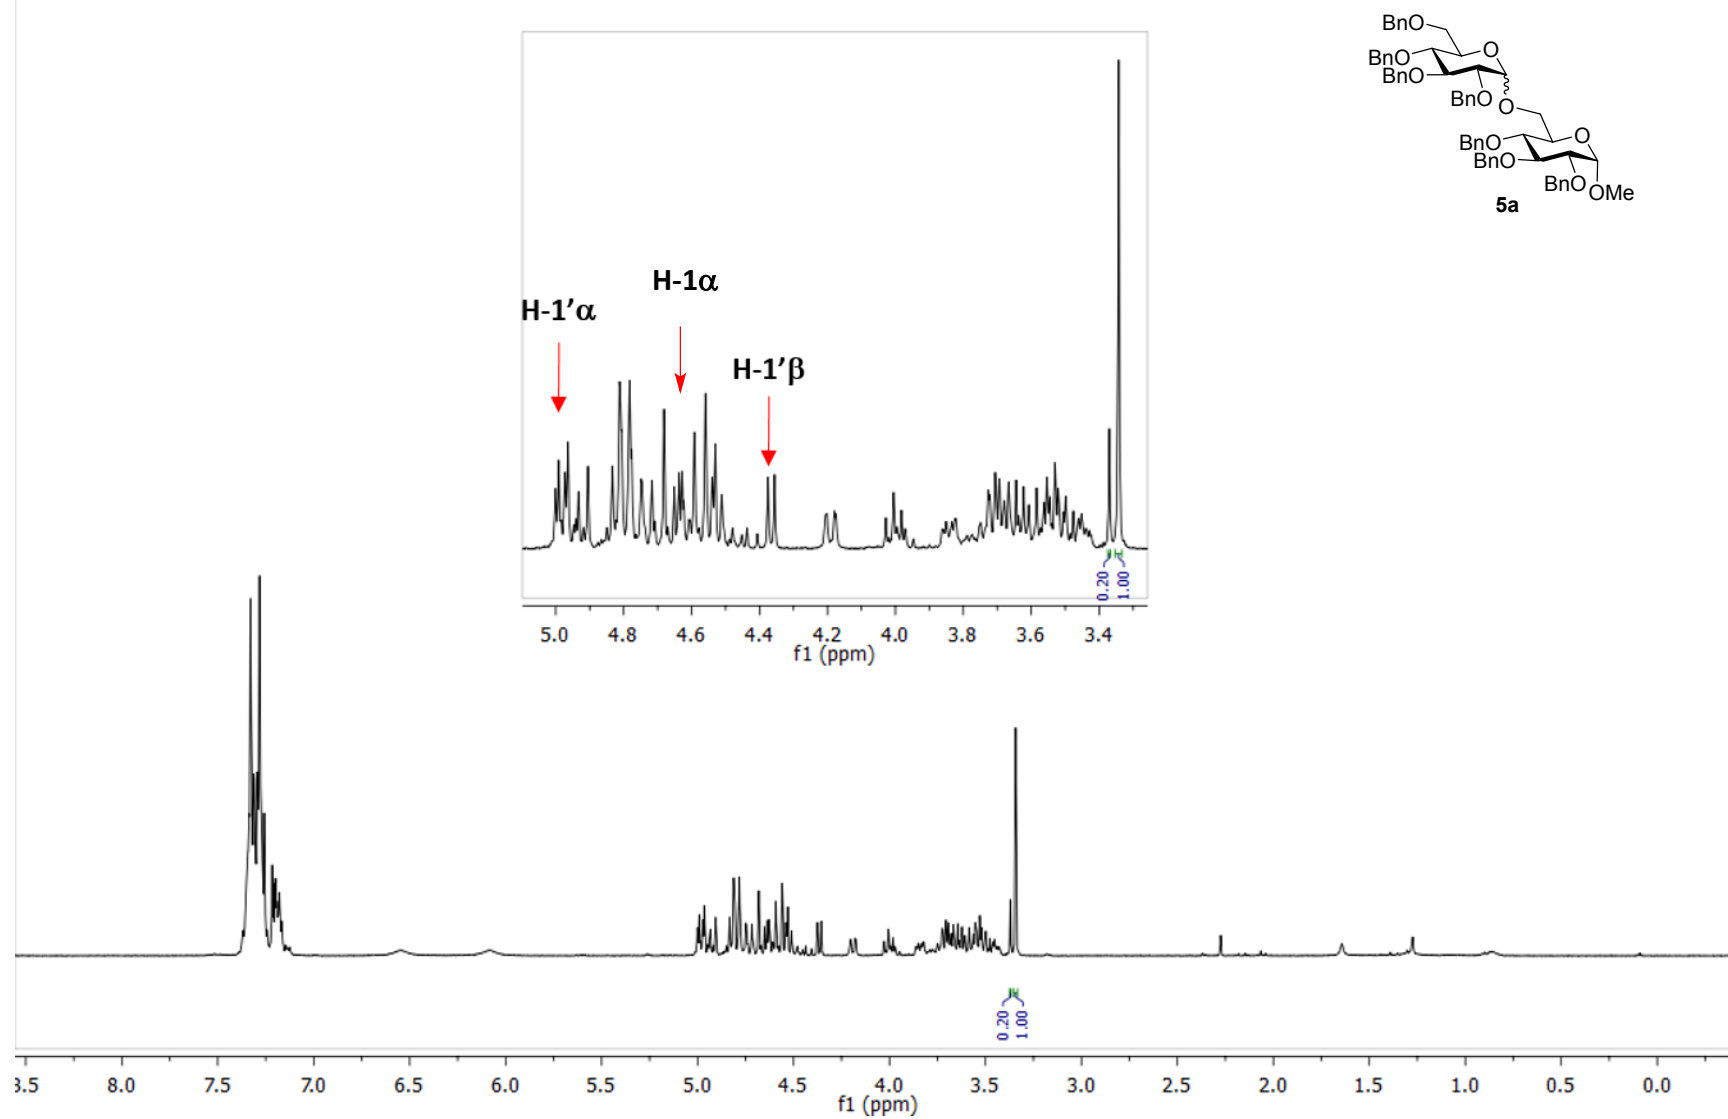

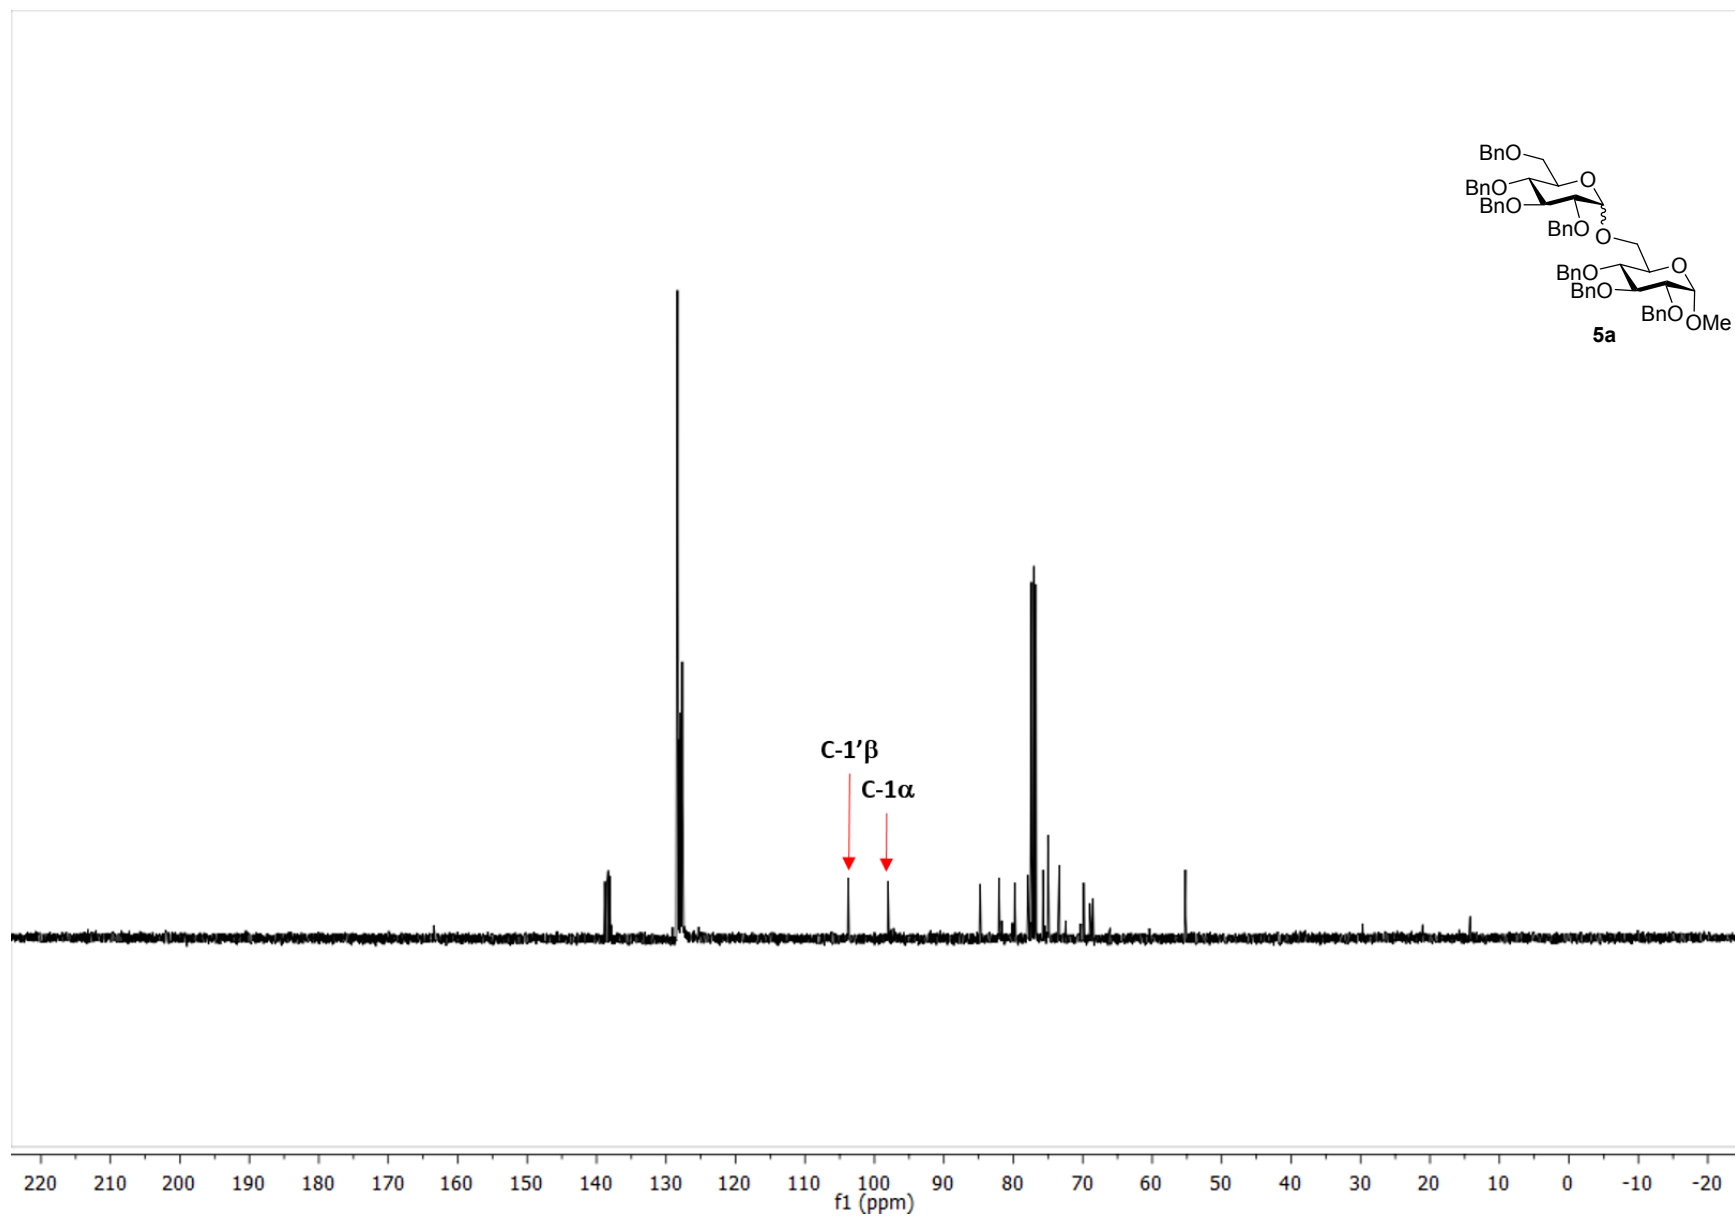

sv9417\_SMV231A\_PROTON01

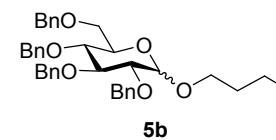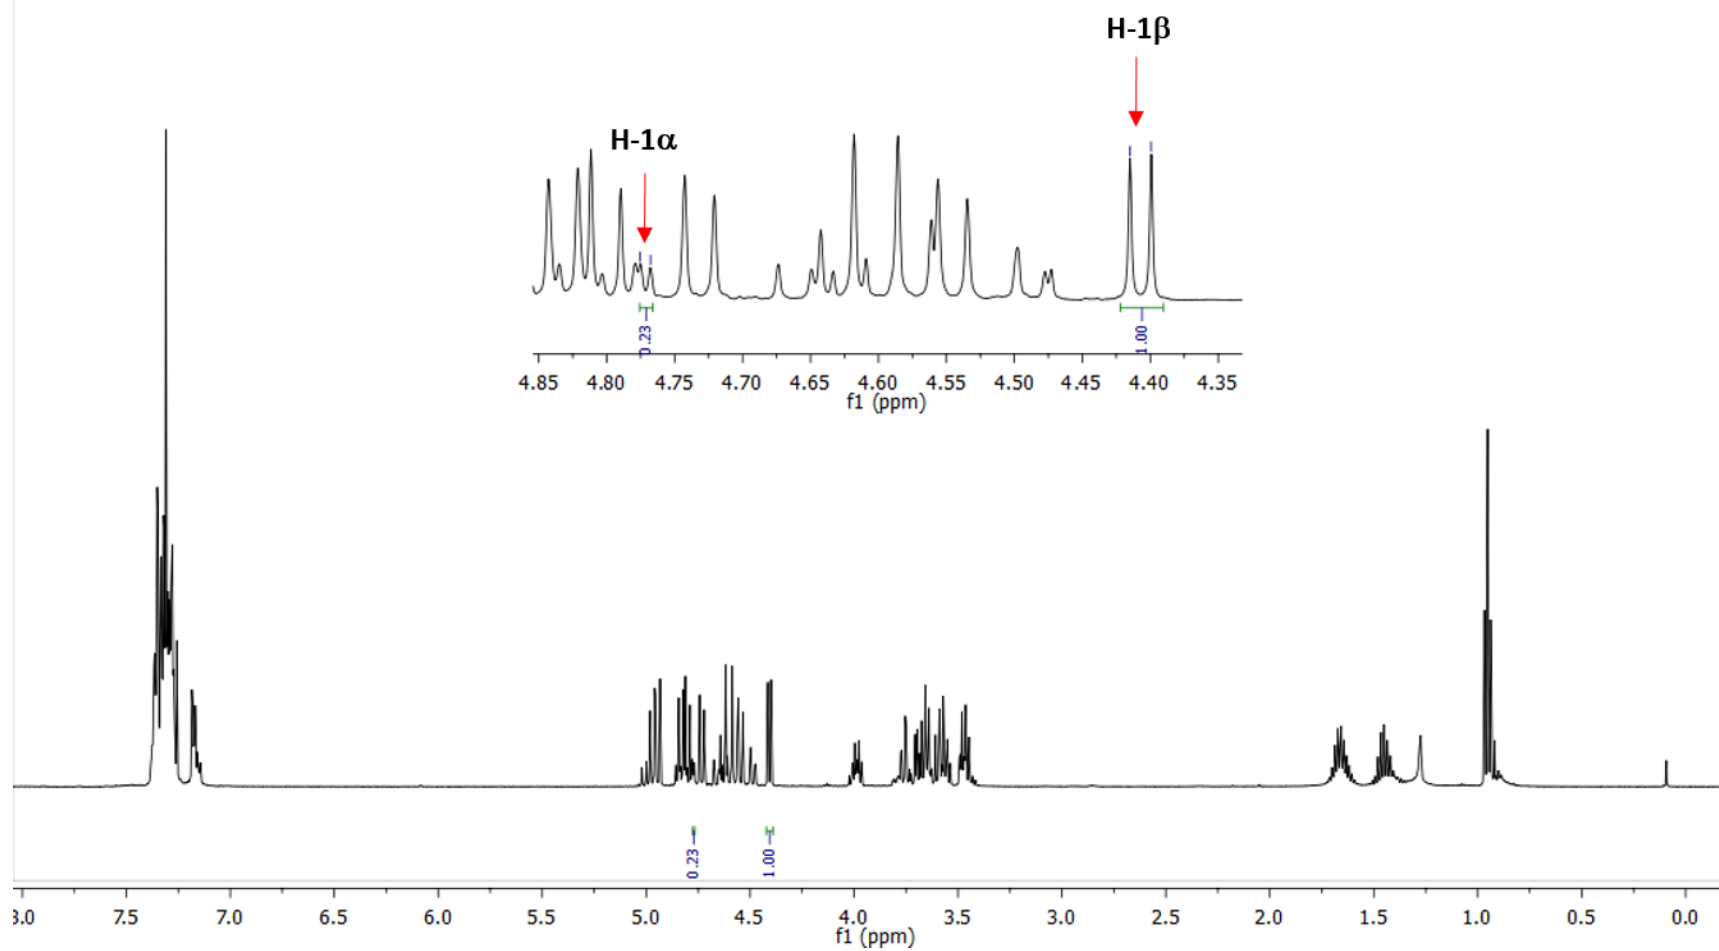

sv107012\_SMV231A\_CARBON\_01

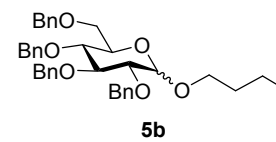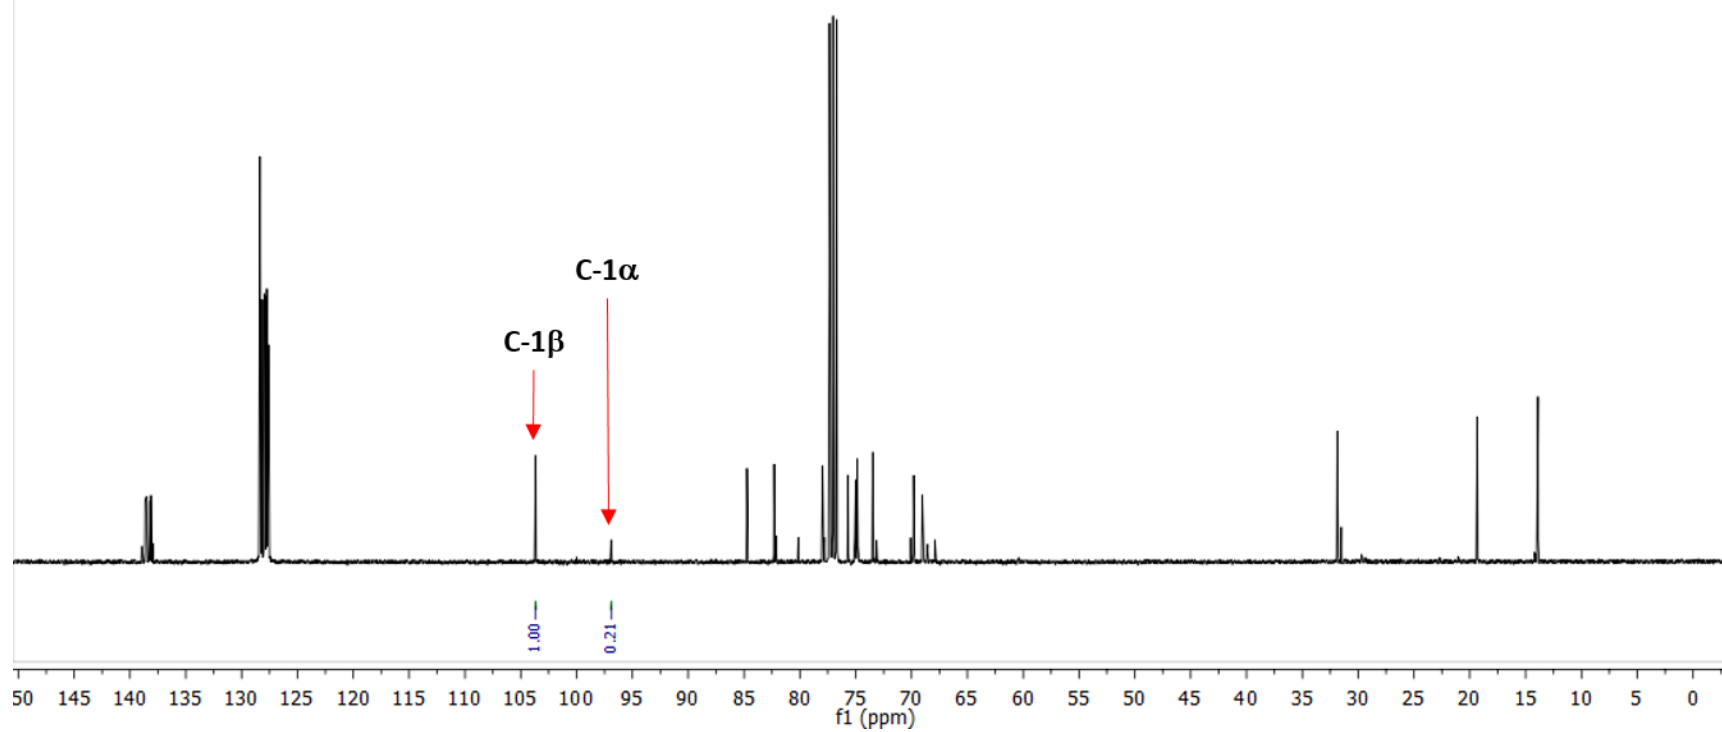

sv117100\_SMV271A\_PROTON\_01

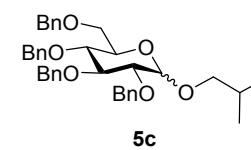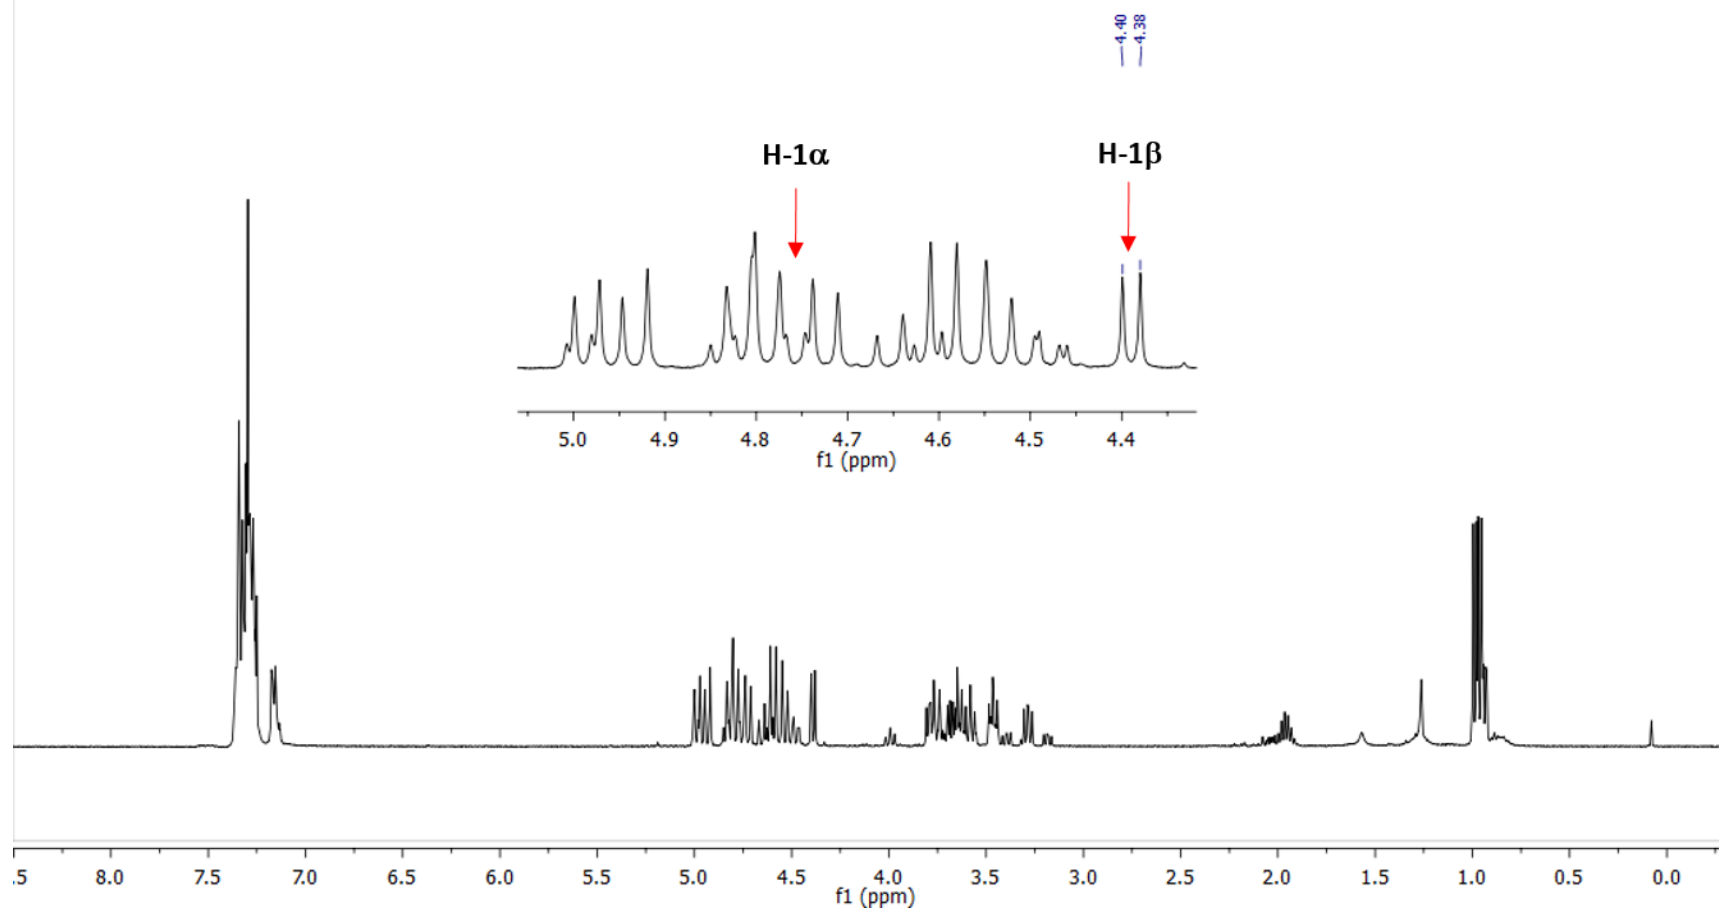

sv117100\_SMV271A\_CARBON\_01

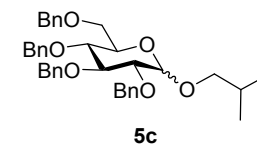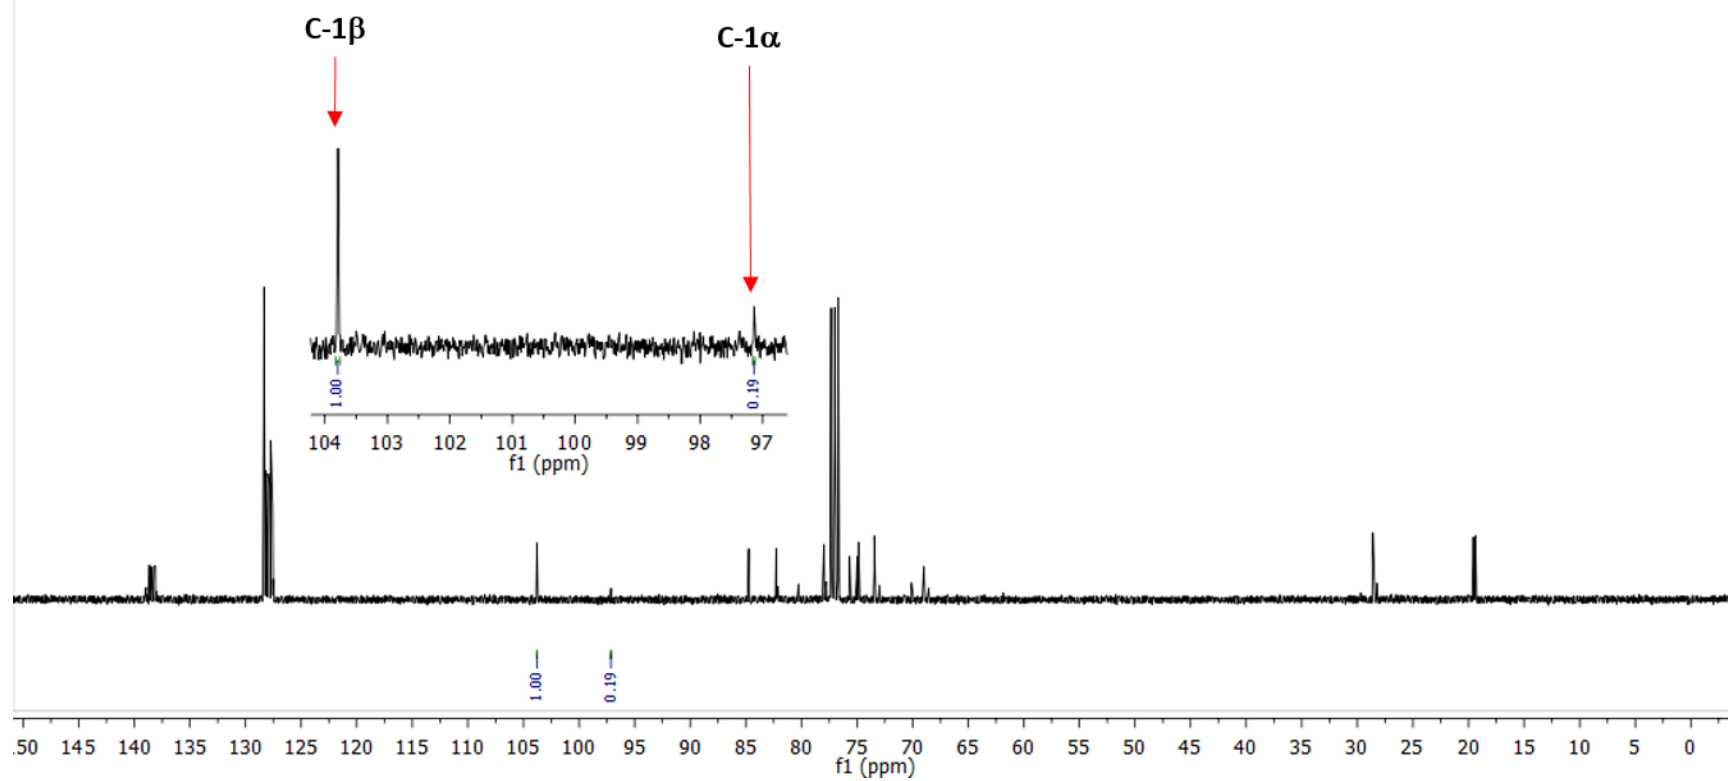

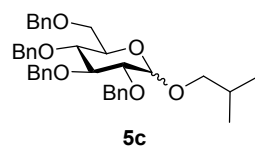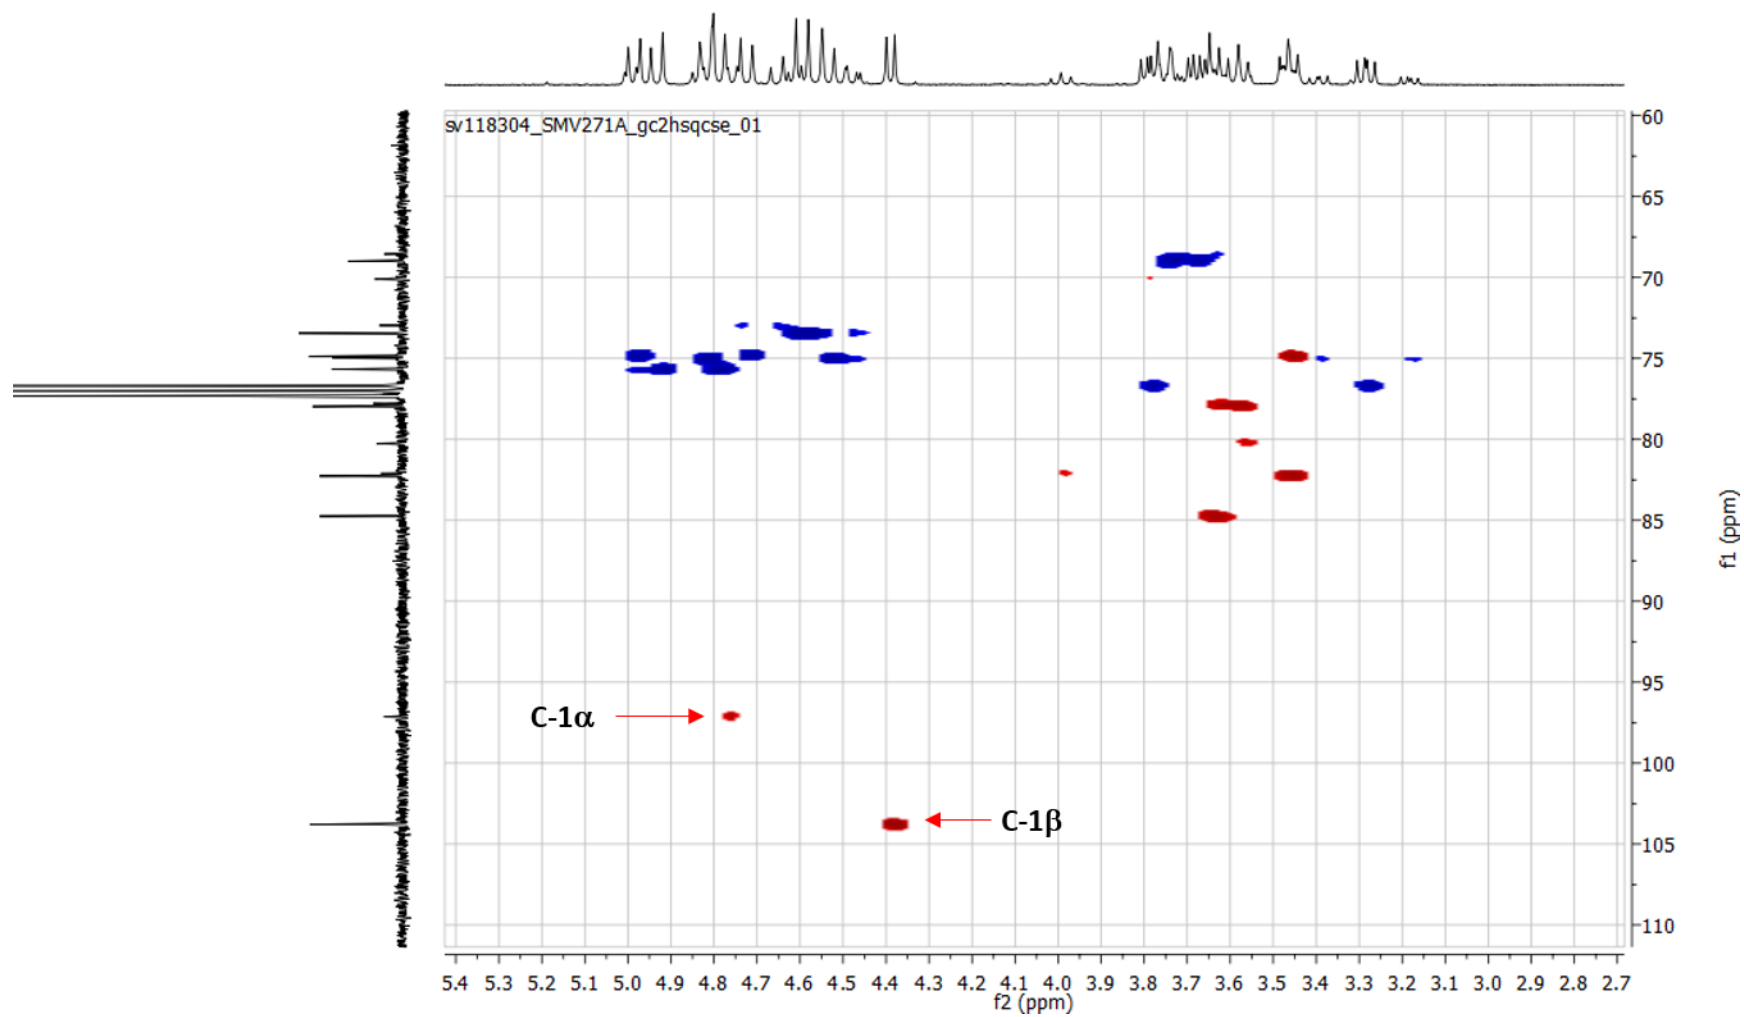



sv107013\_SMV233A\_PROTON\_01

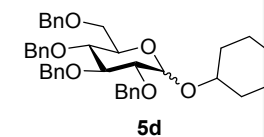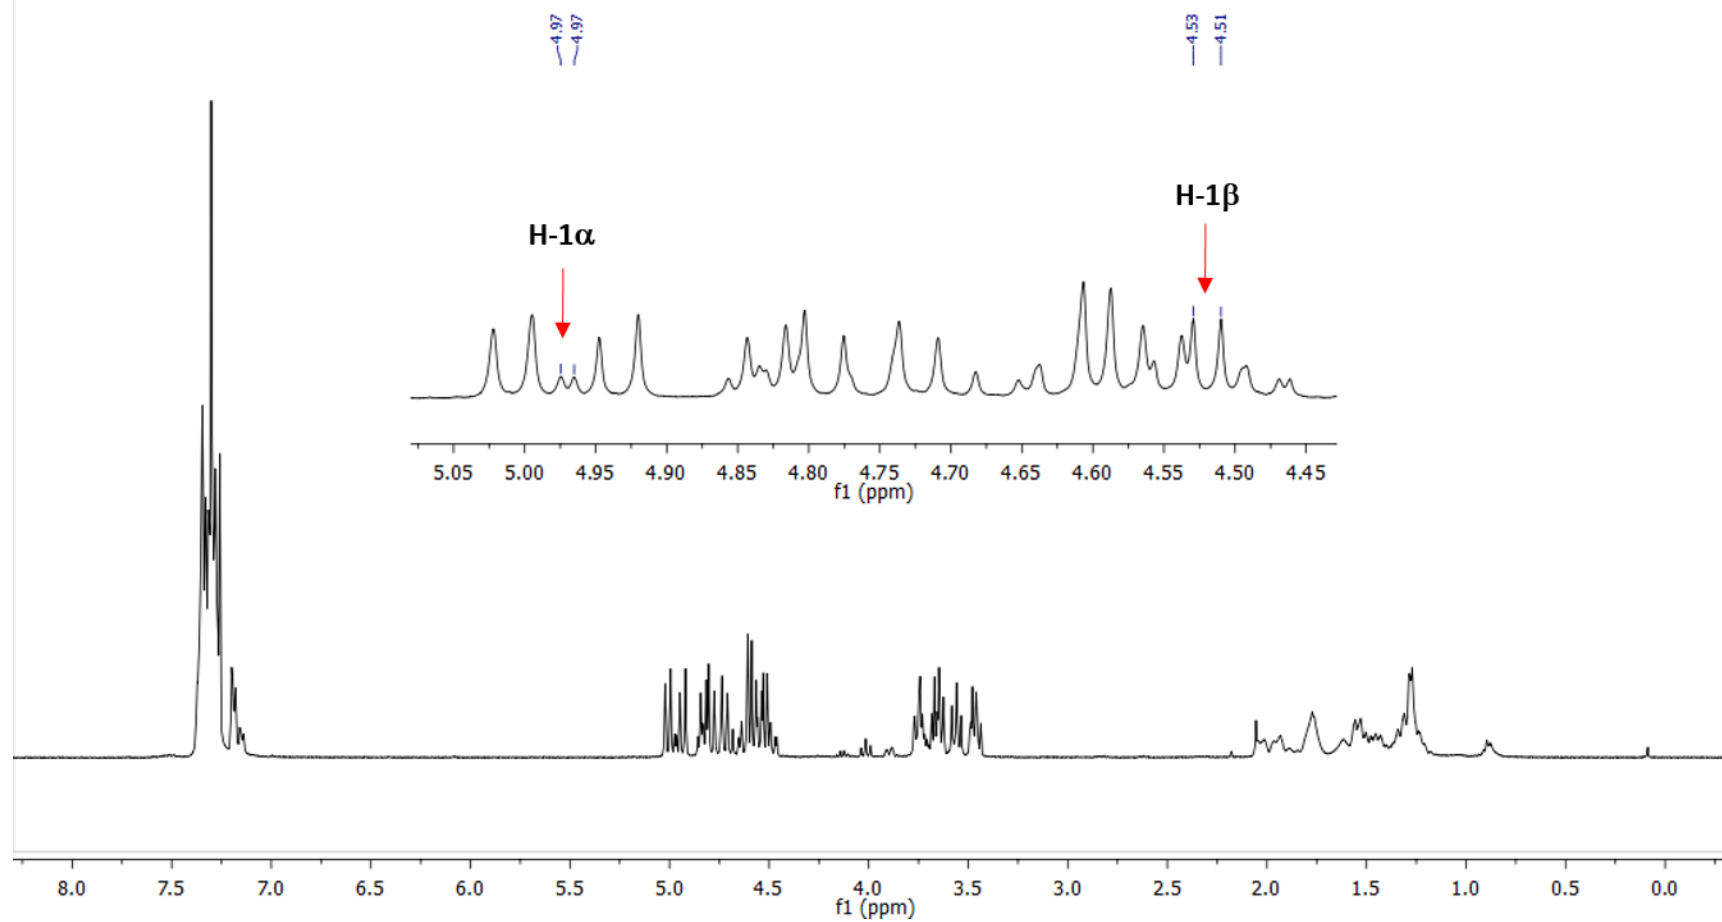

sv107013\_SMV233A\_CARBON\_01

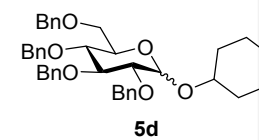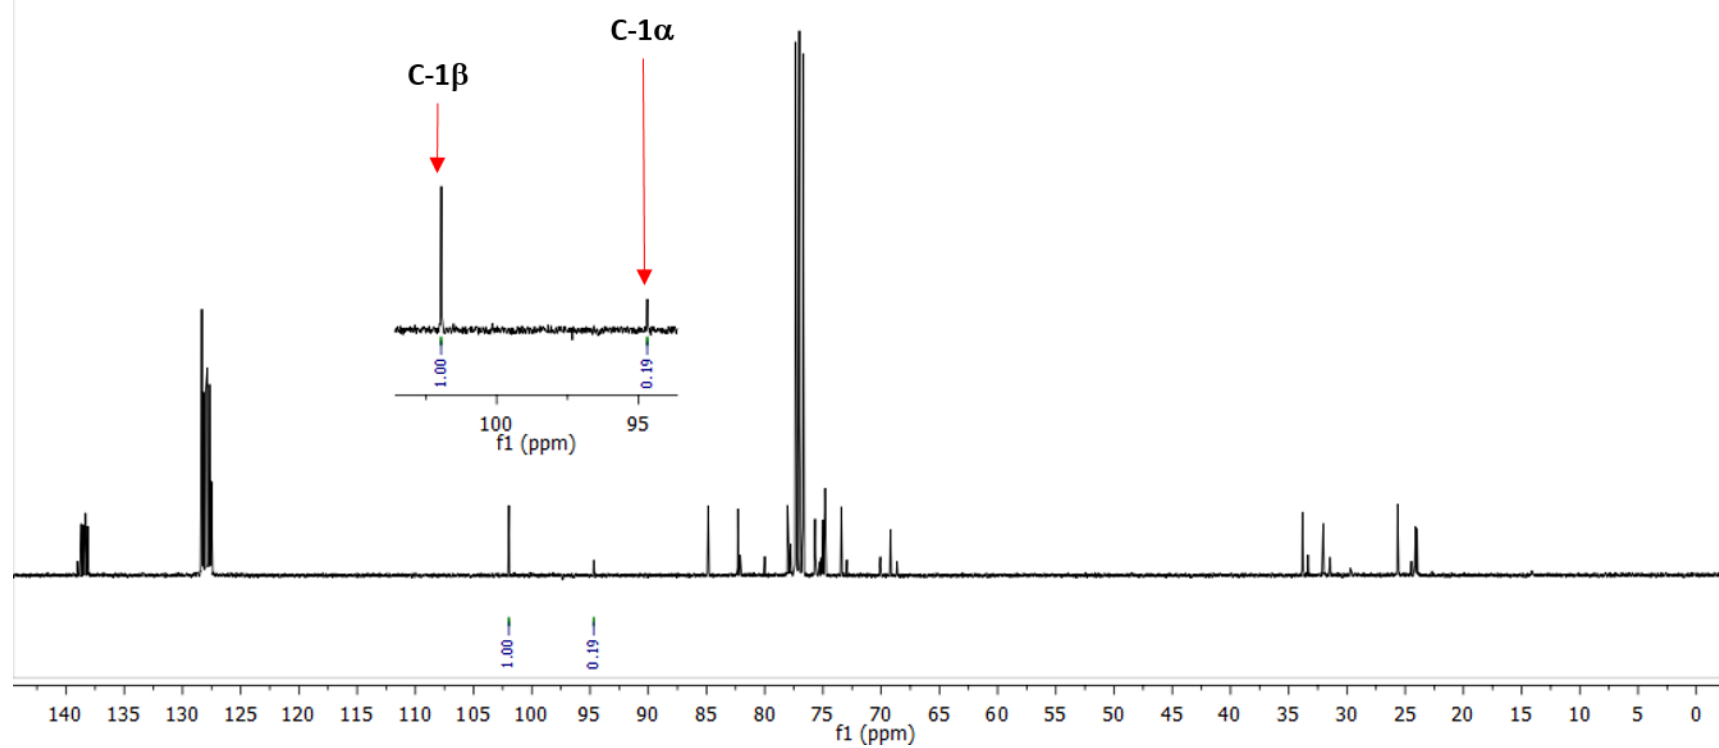

0563\_SMV174\_2E/10

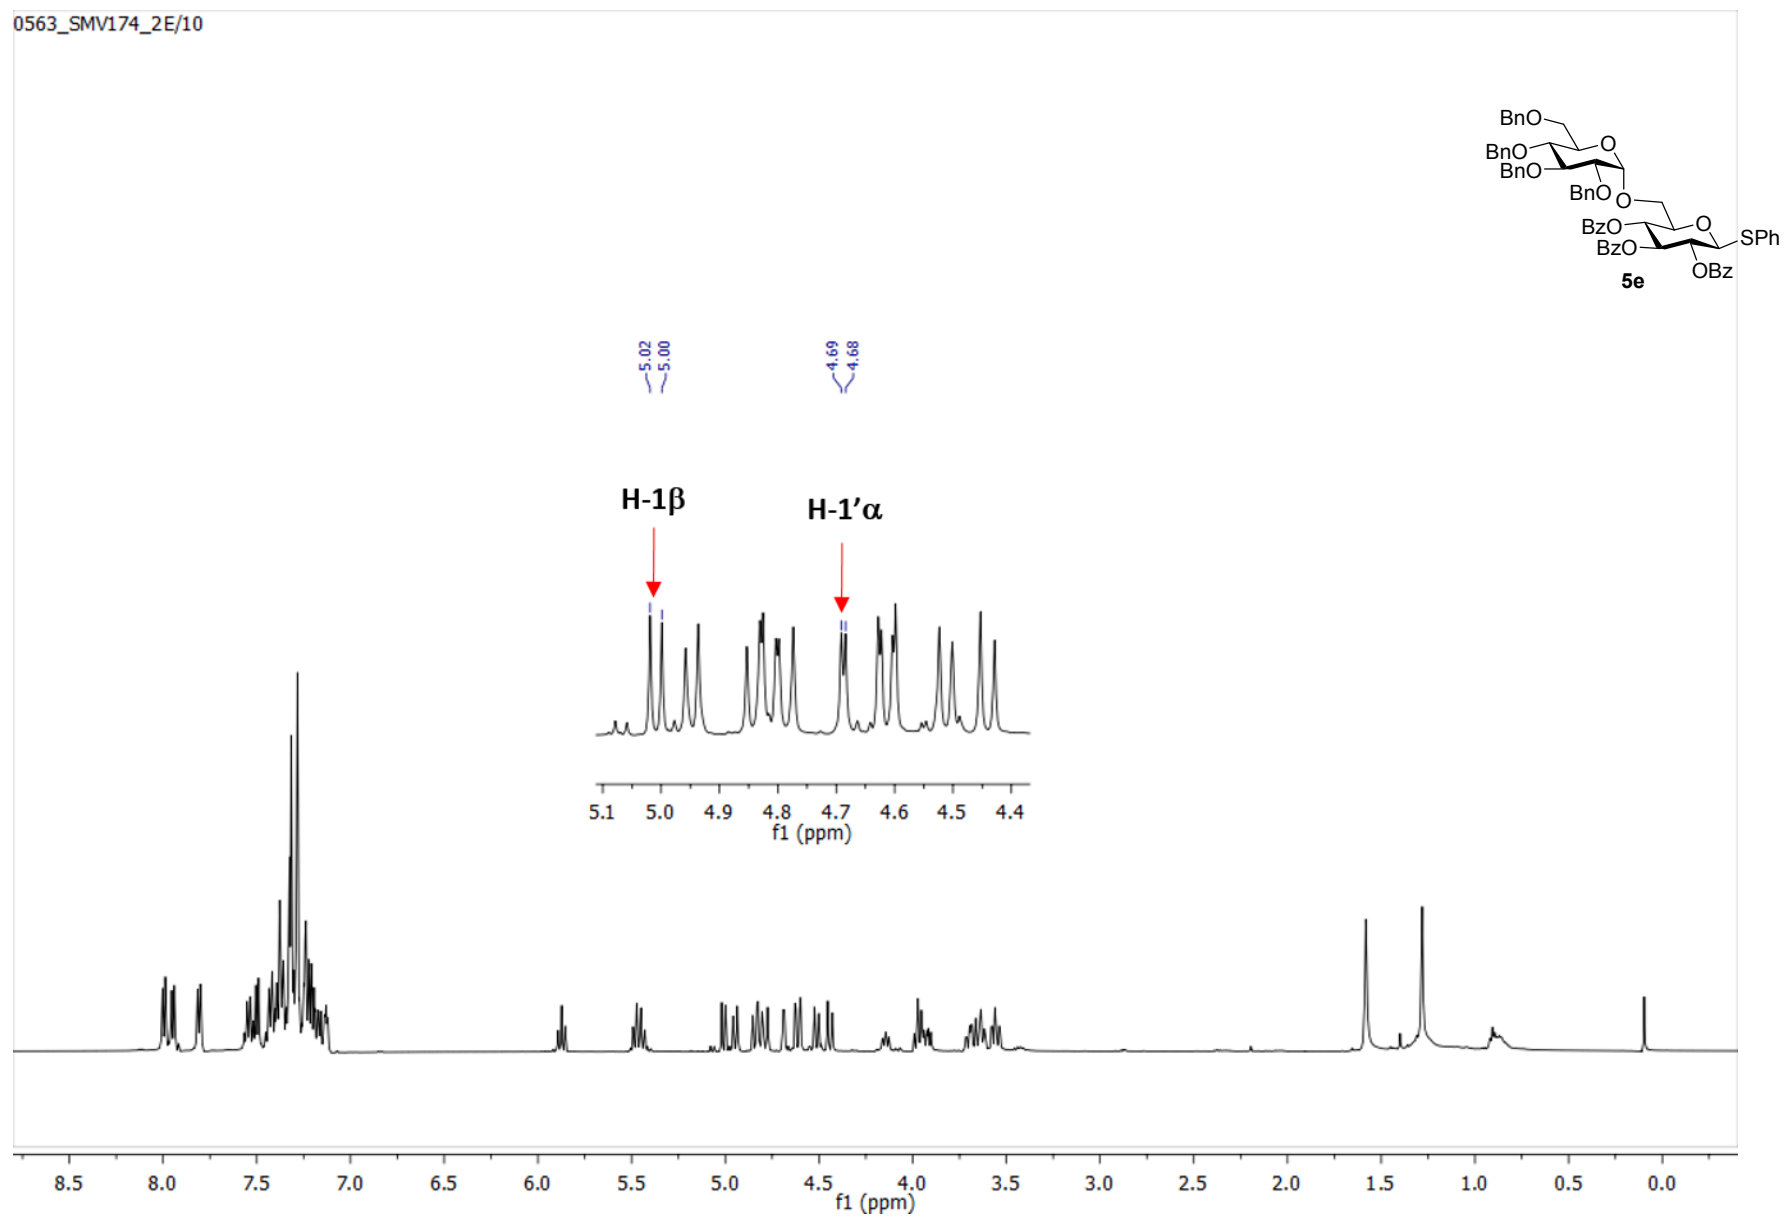

0578 SMV174-2E/10

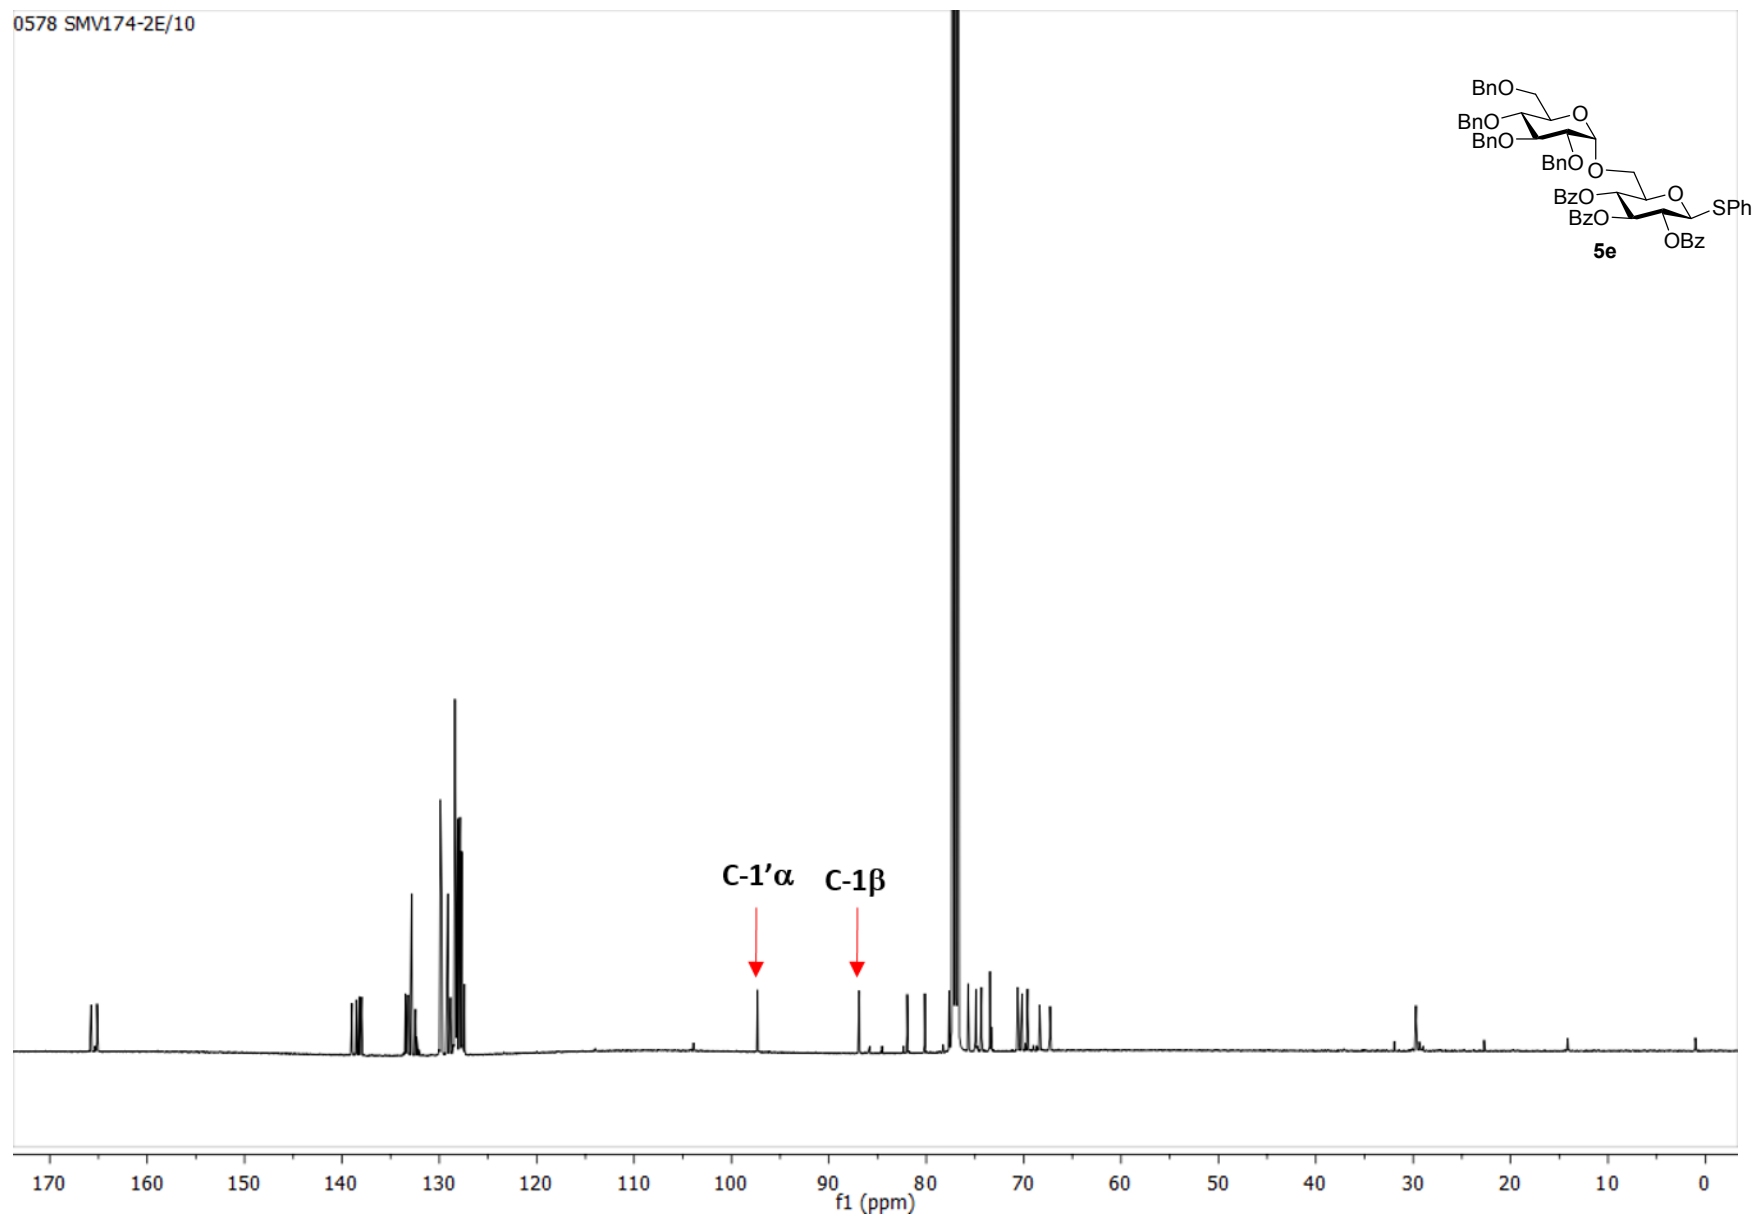

S19

SV106692\_SMV222A\_PROTON\_01

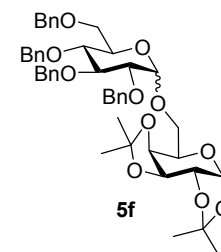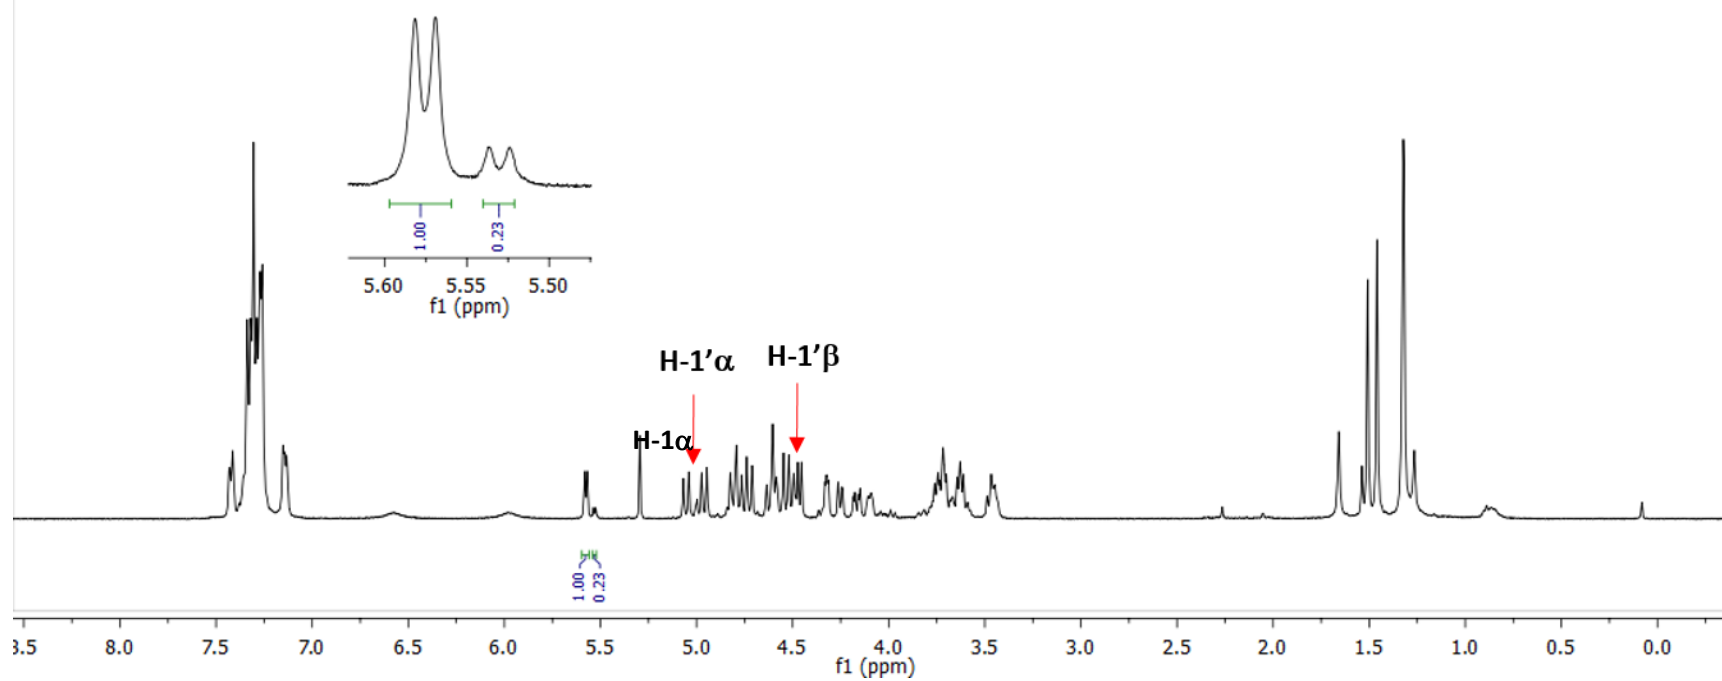

sv106692\_SMV222A\_CARBON\_01

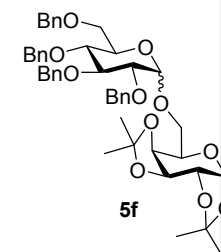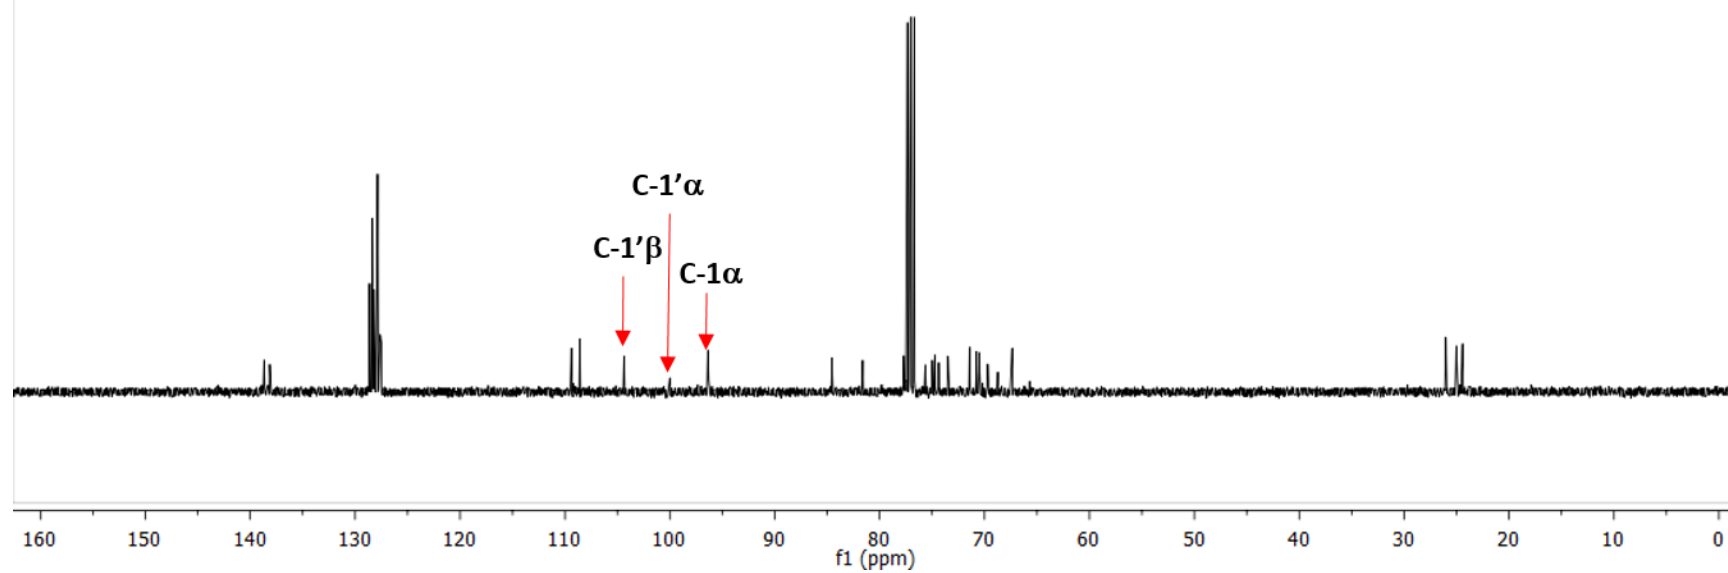

S21

sv8903\_SMV173\_2-E\_PROTON01

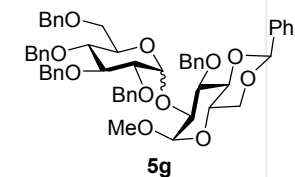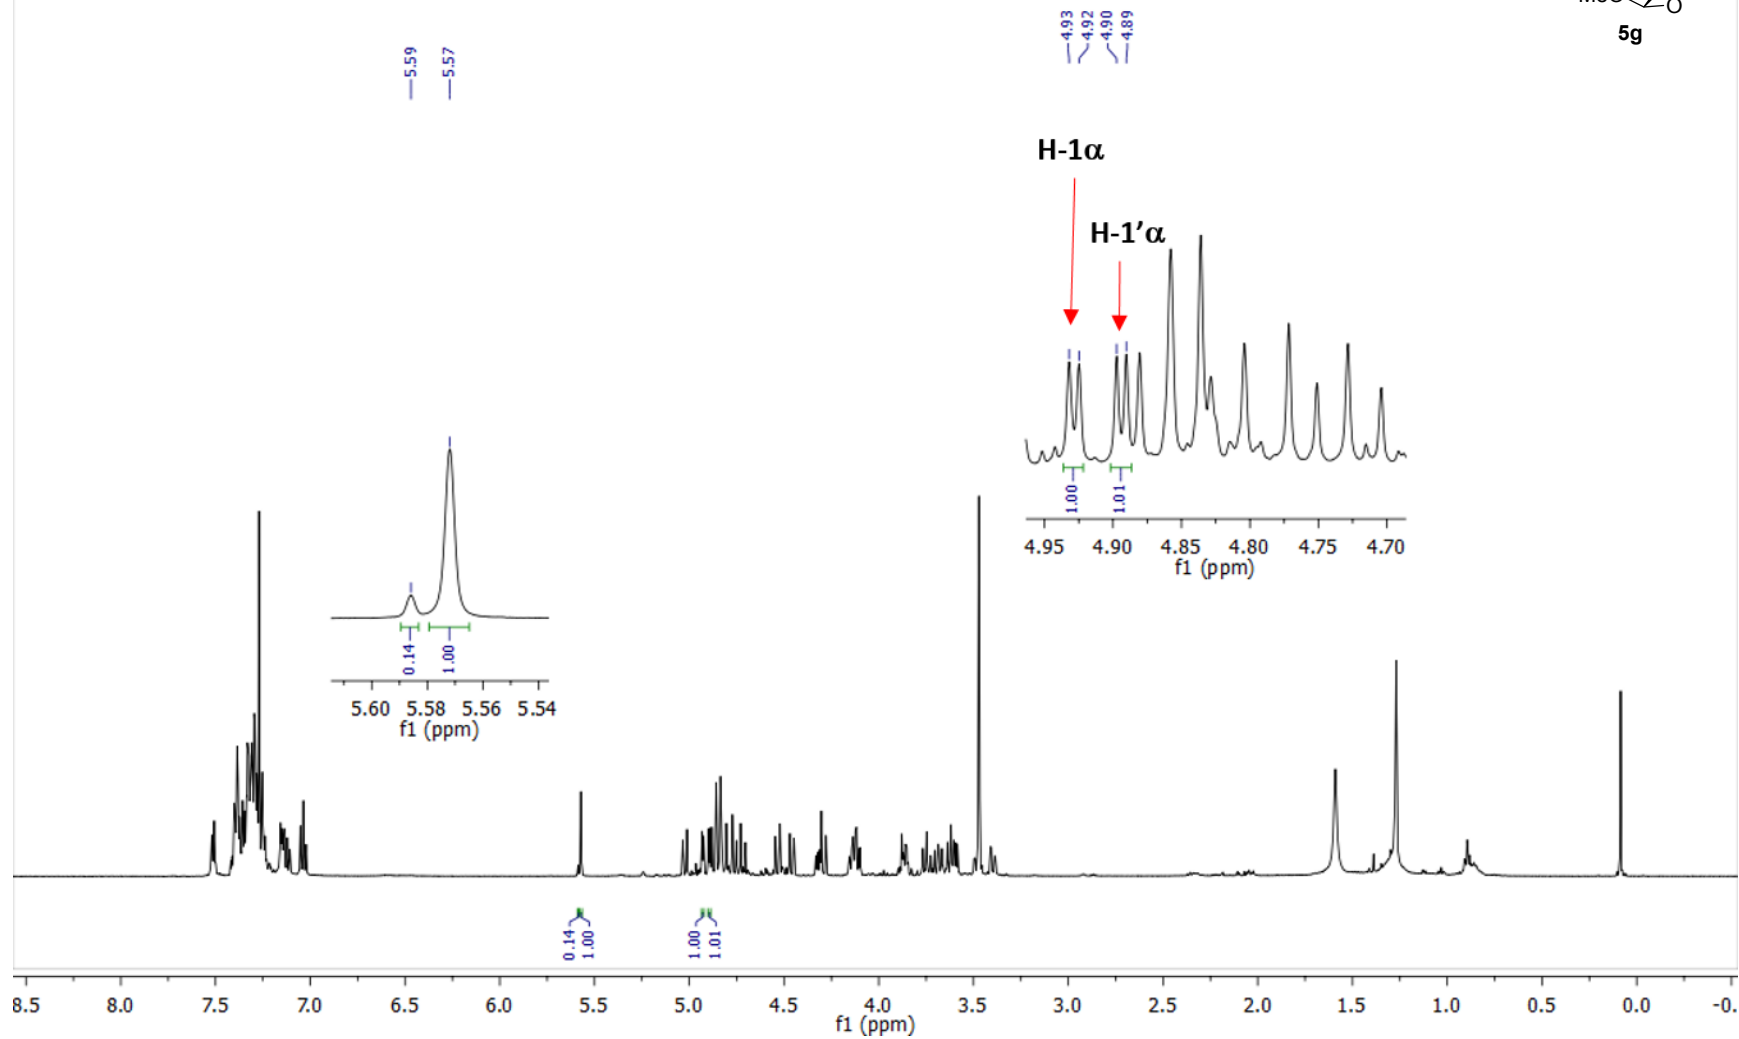

sv18482\_SMV173\_2E\_CARBON\_001

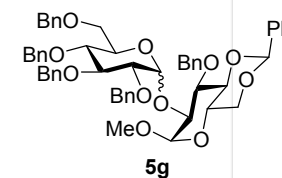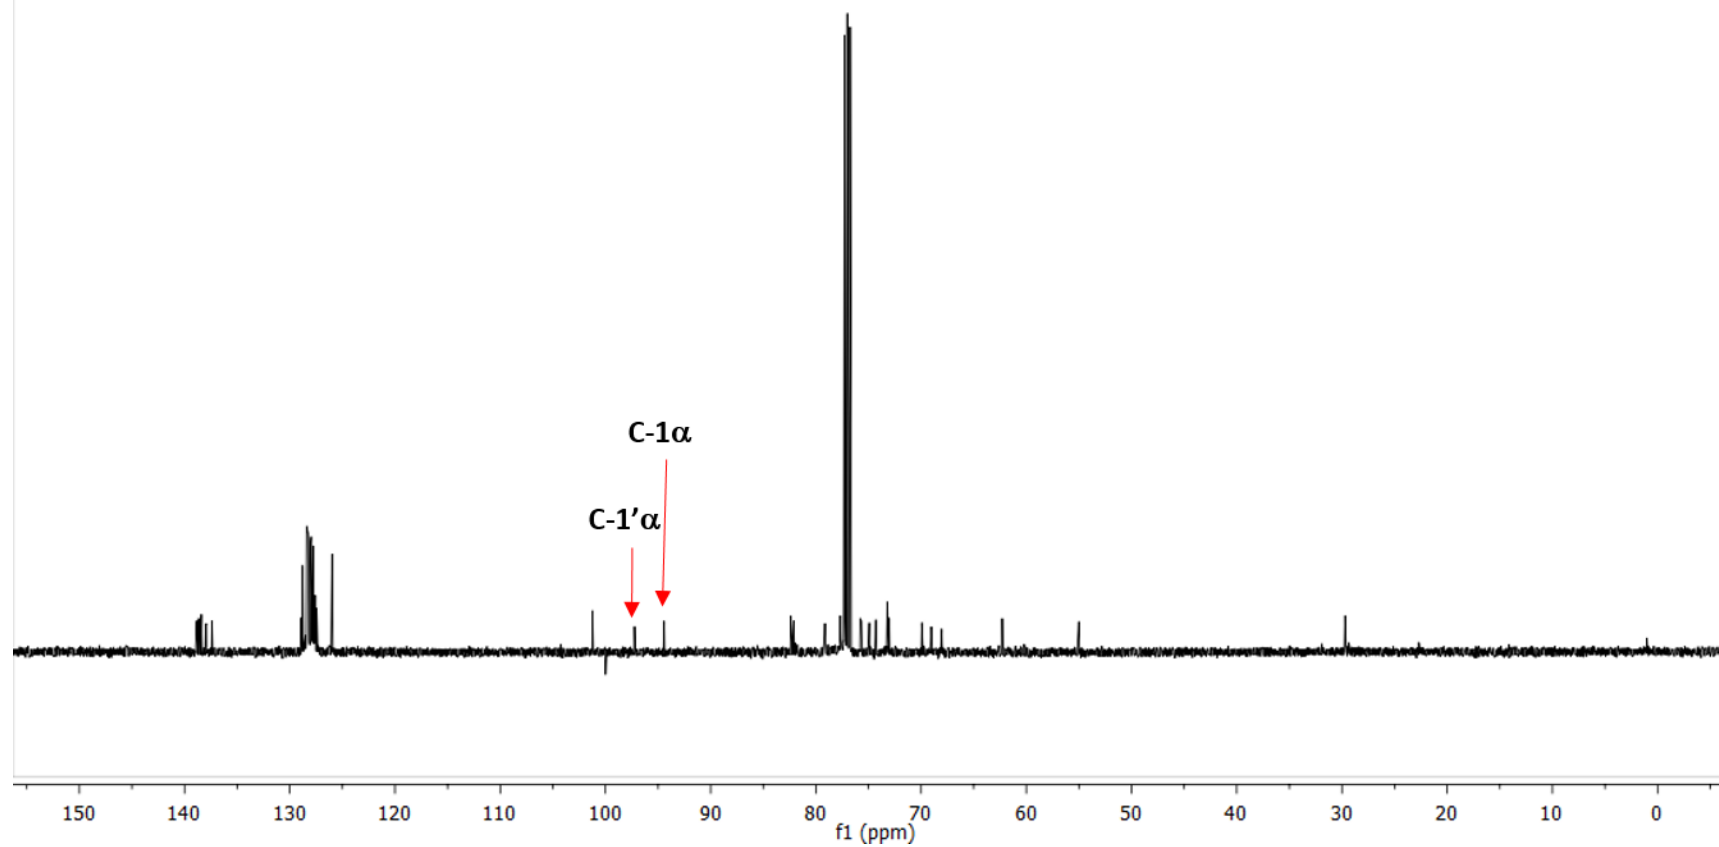

S23



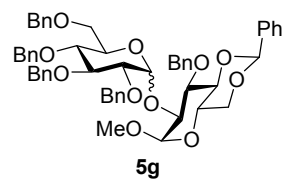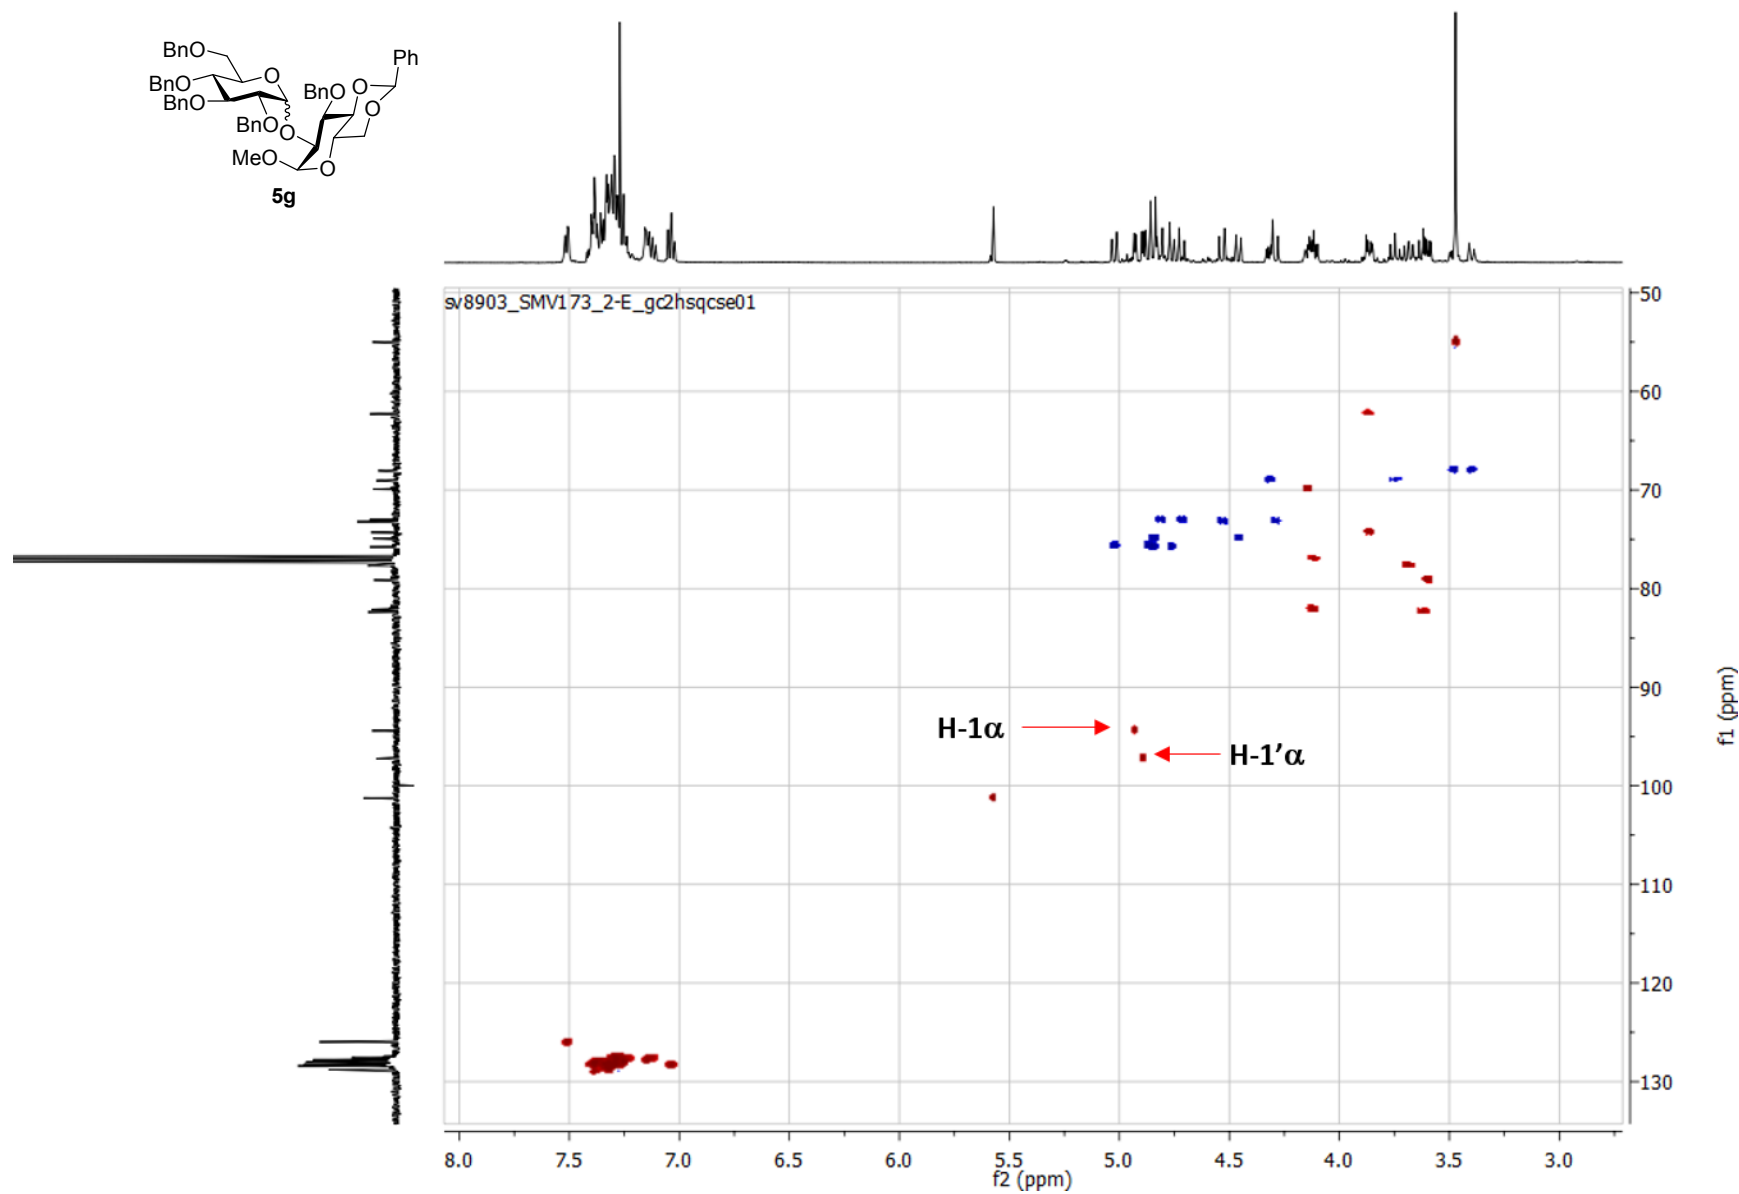

sv117455\_SMV276B\_PROTON\_01

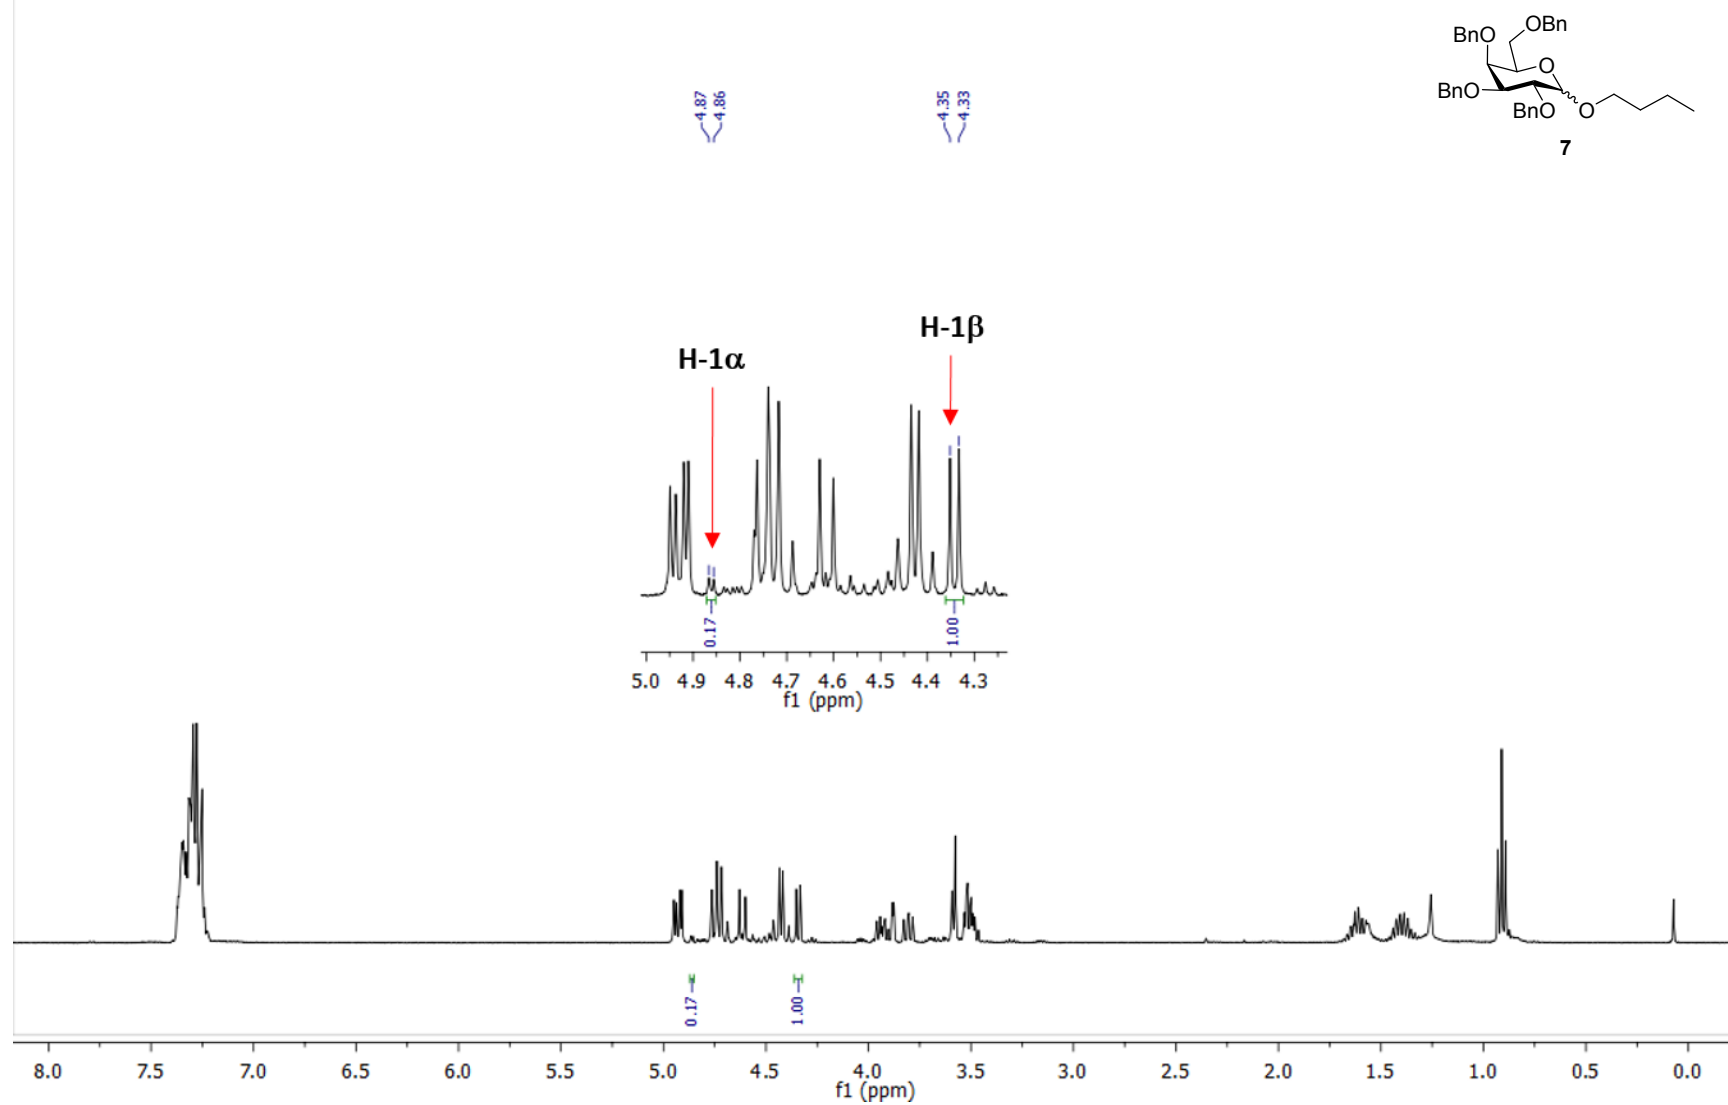

sv117455\_SMV276B\_CARBON\_01

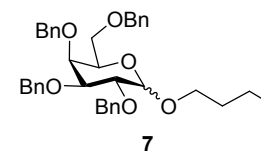

7

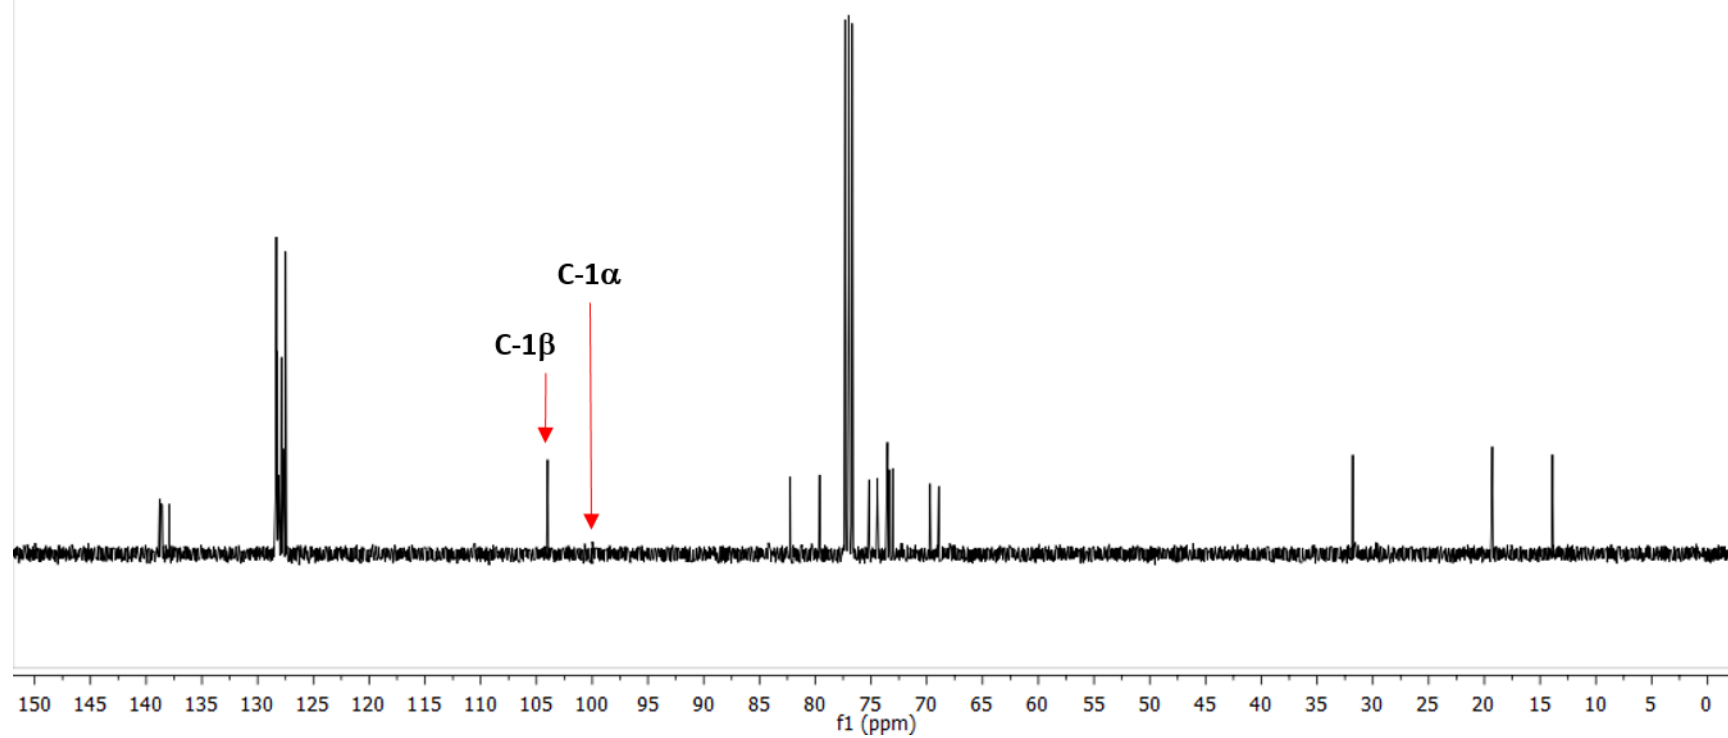

sv118081\_SMV282A\_PROTON\_01

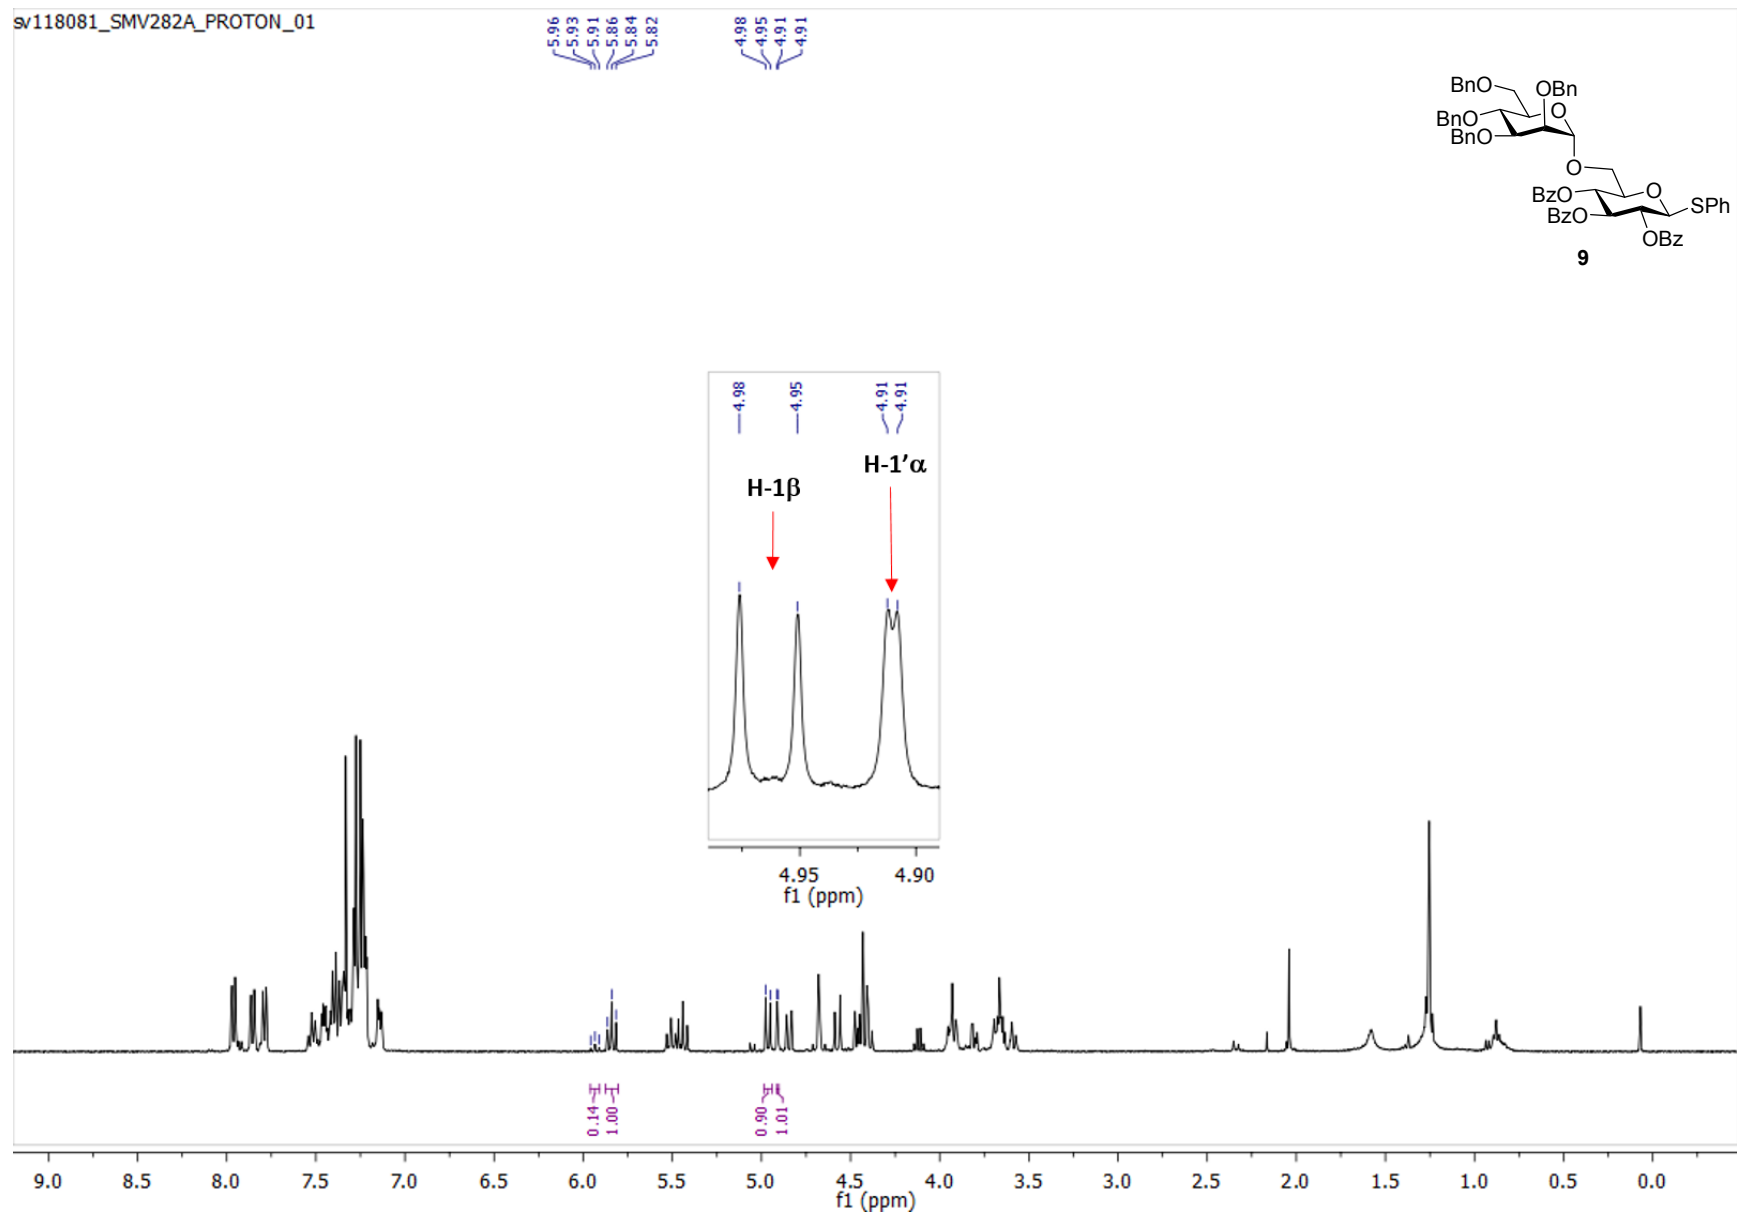

sv19614\_SMV282A\_CARBON\_001

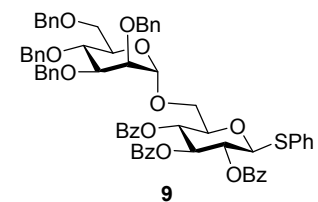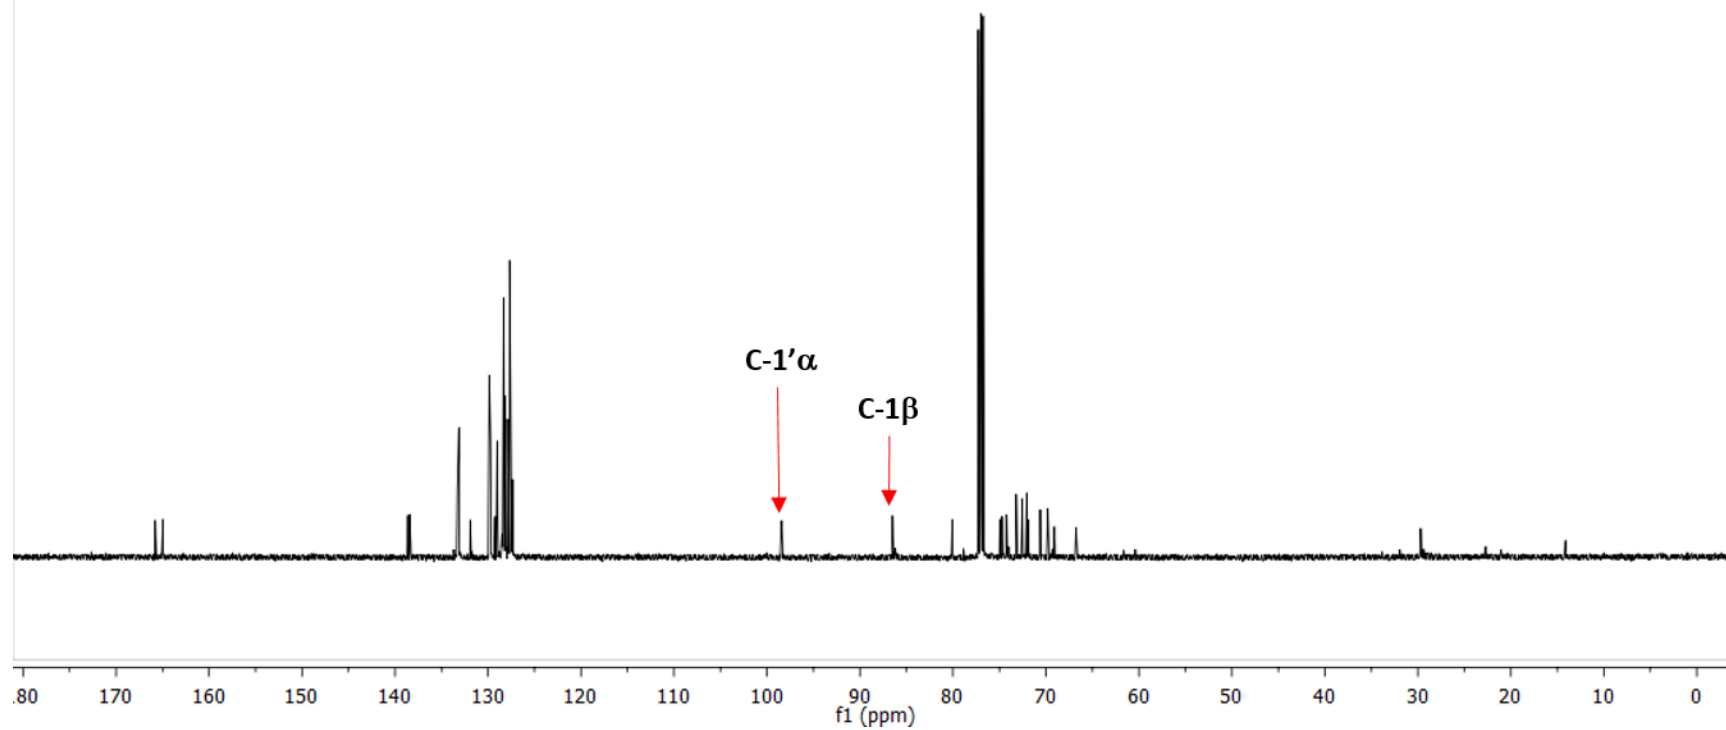

S28

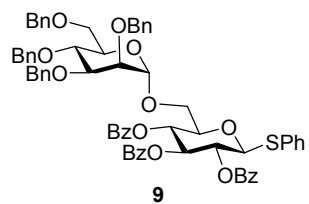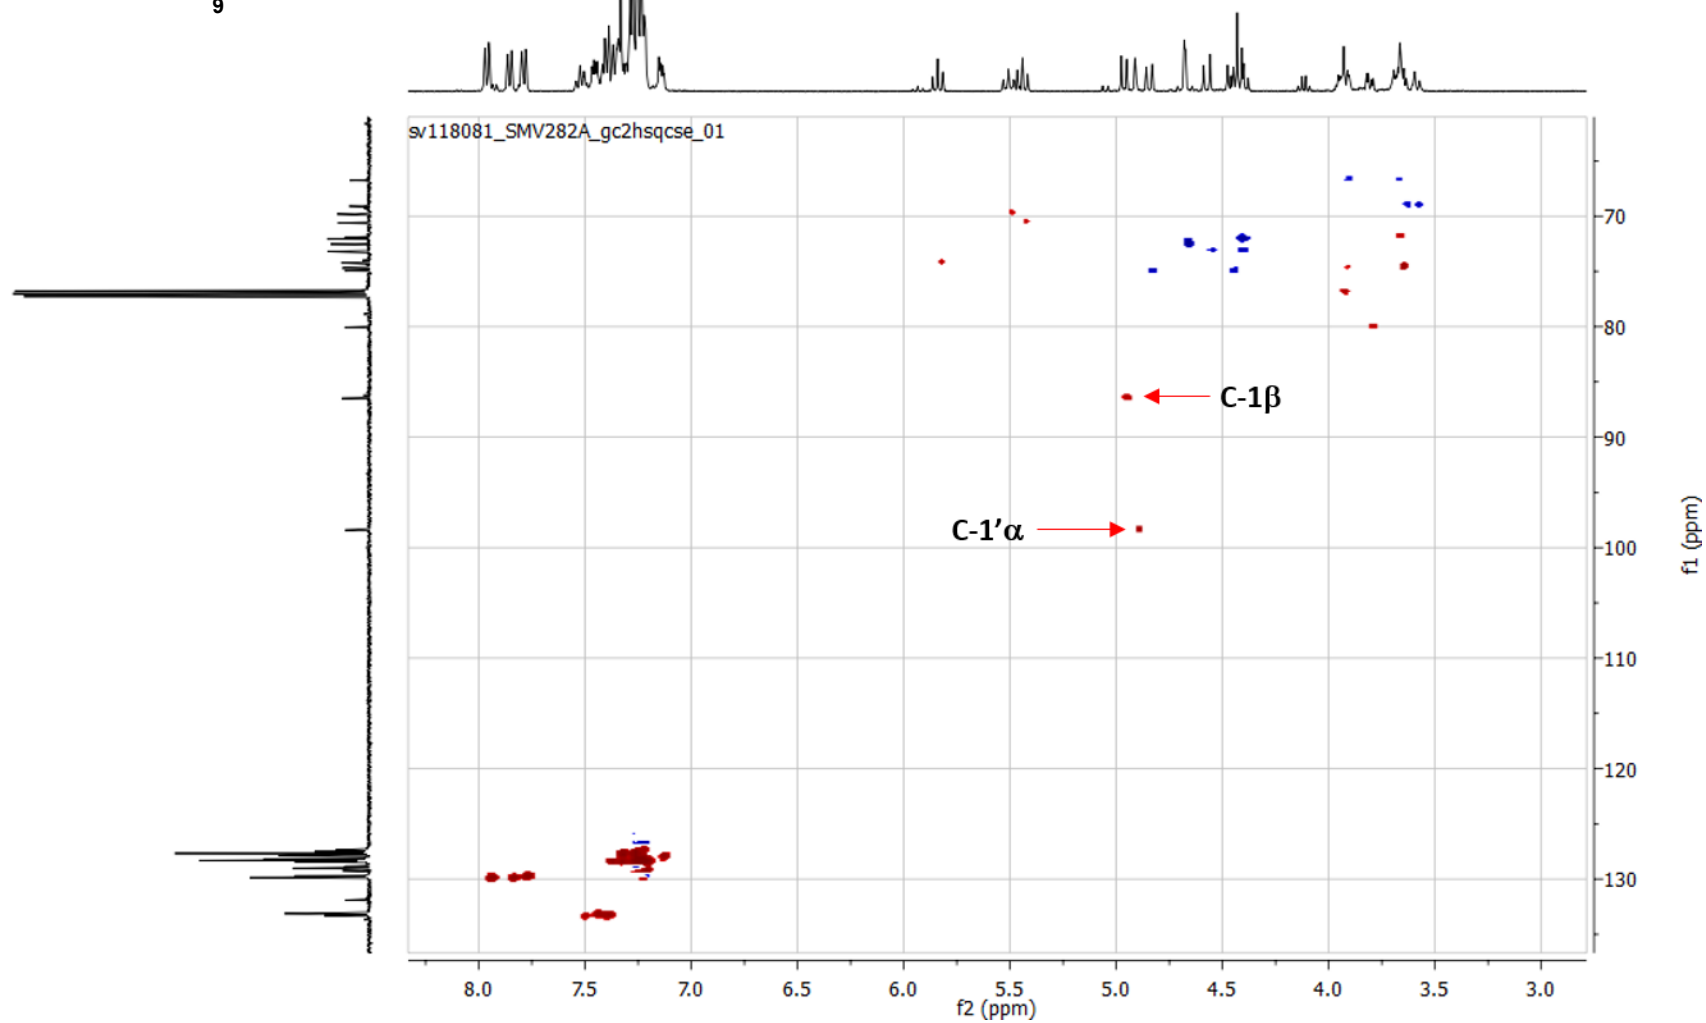

sv121545\_SMV301B2\_PROTON\_01

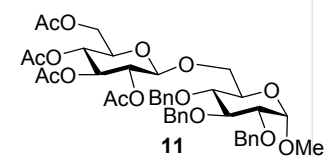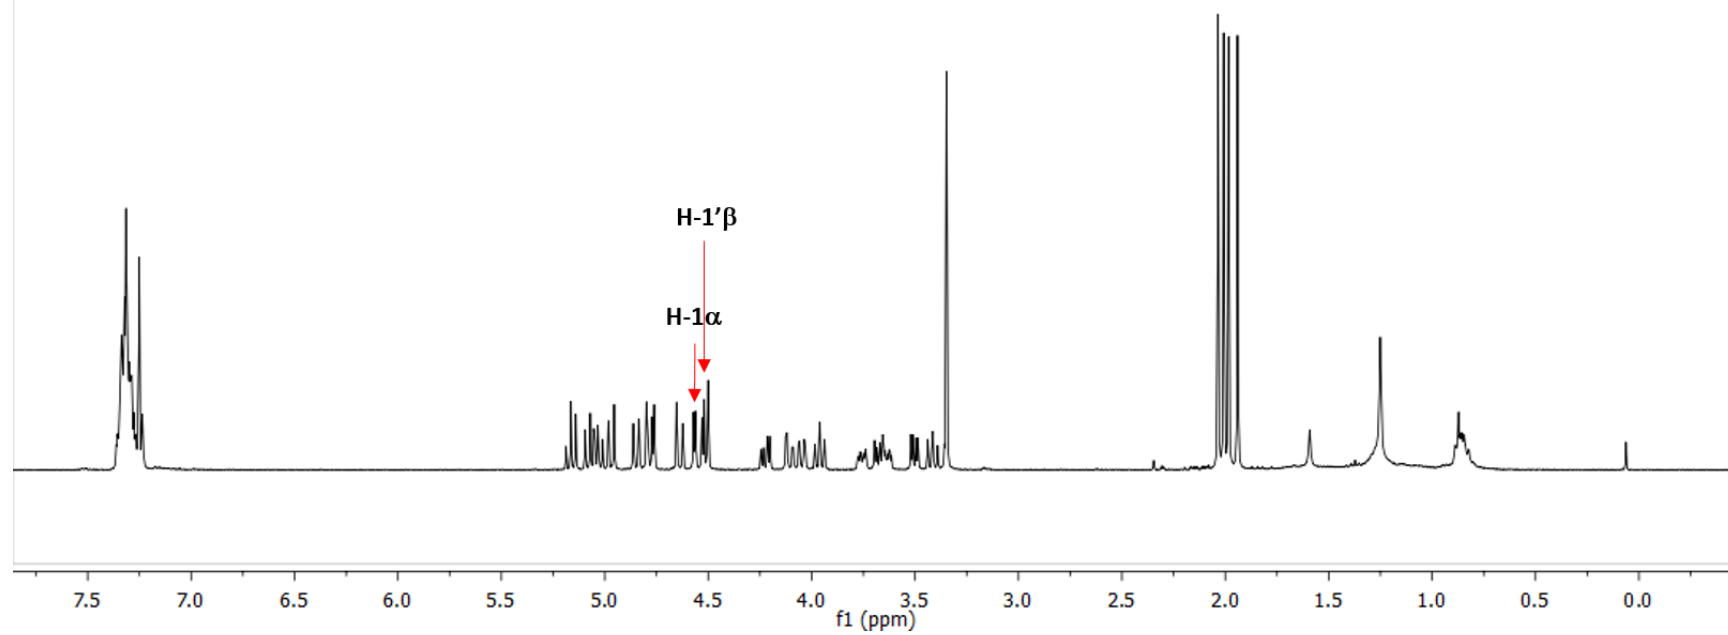

S30

sv121545\_SMV301B2\_CARBON\_01

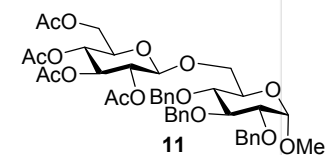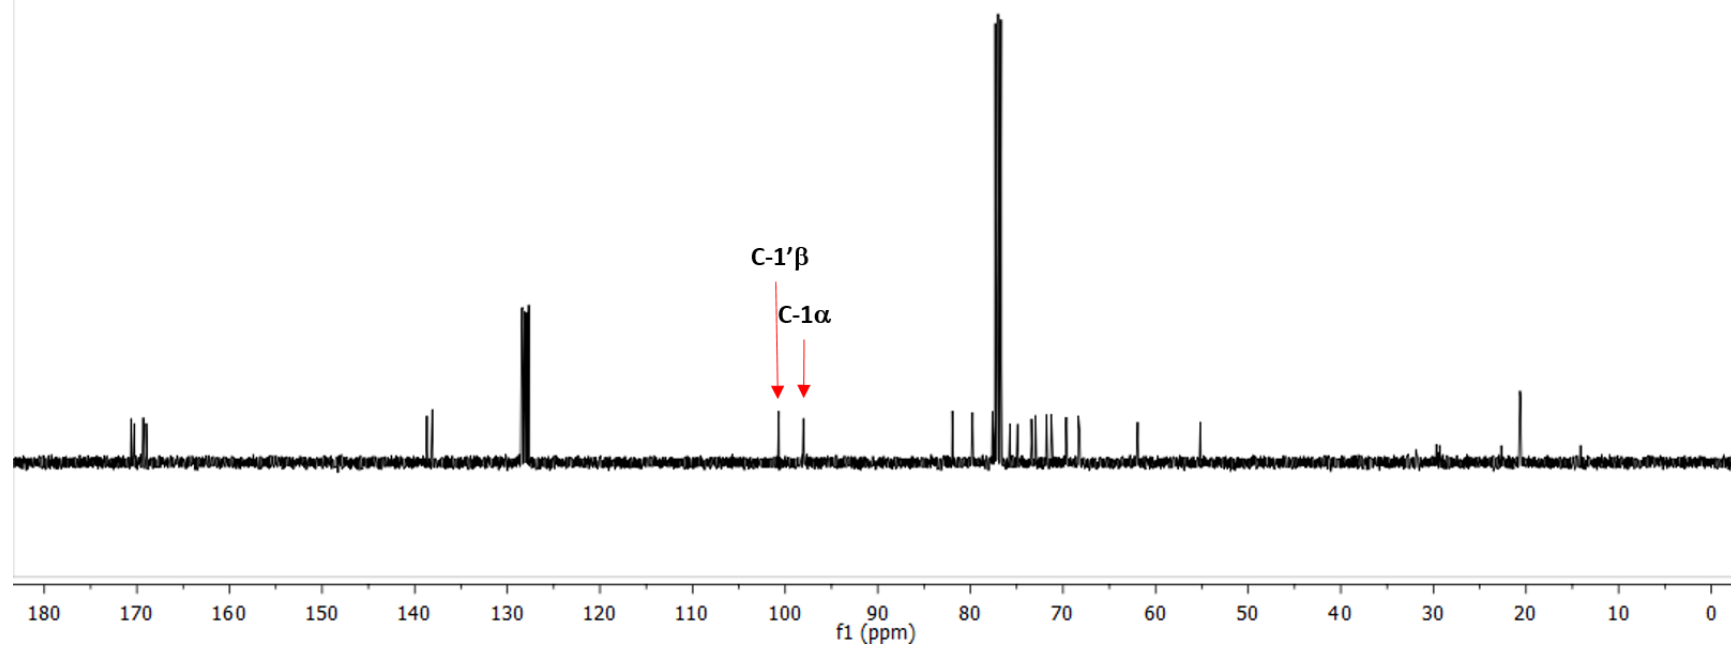

S31



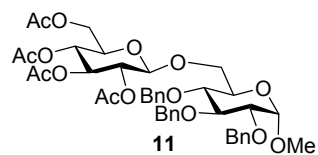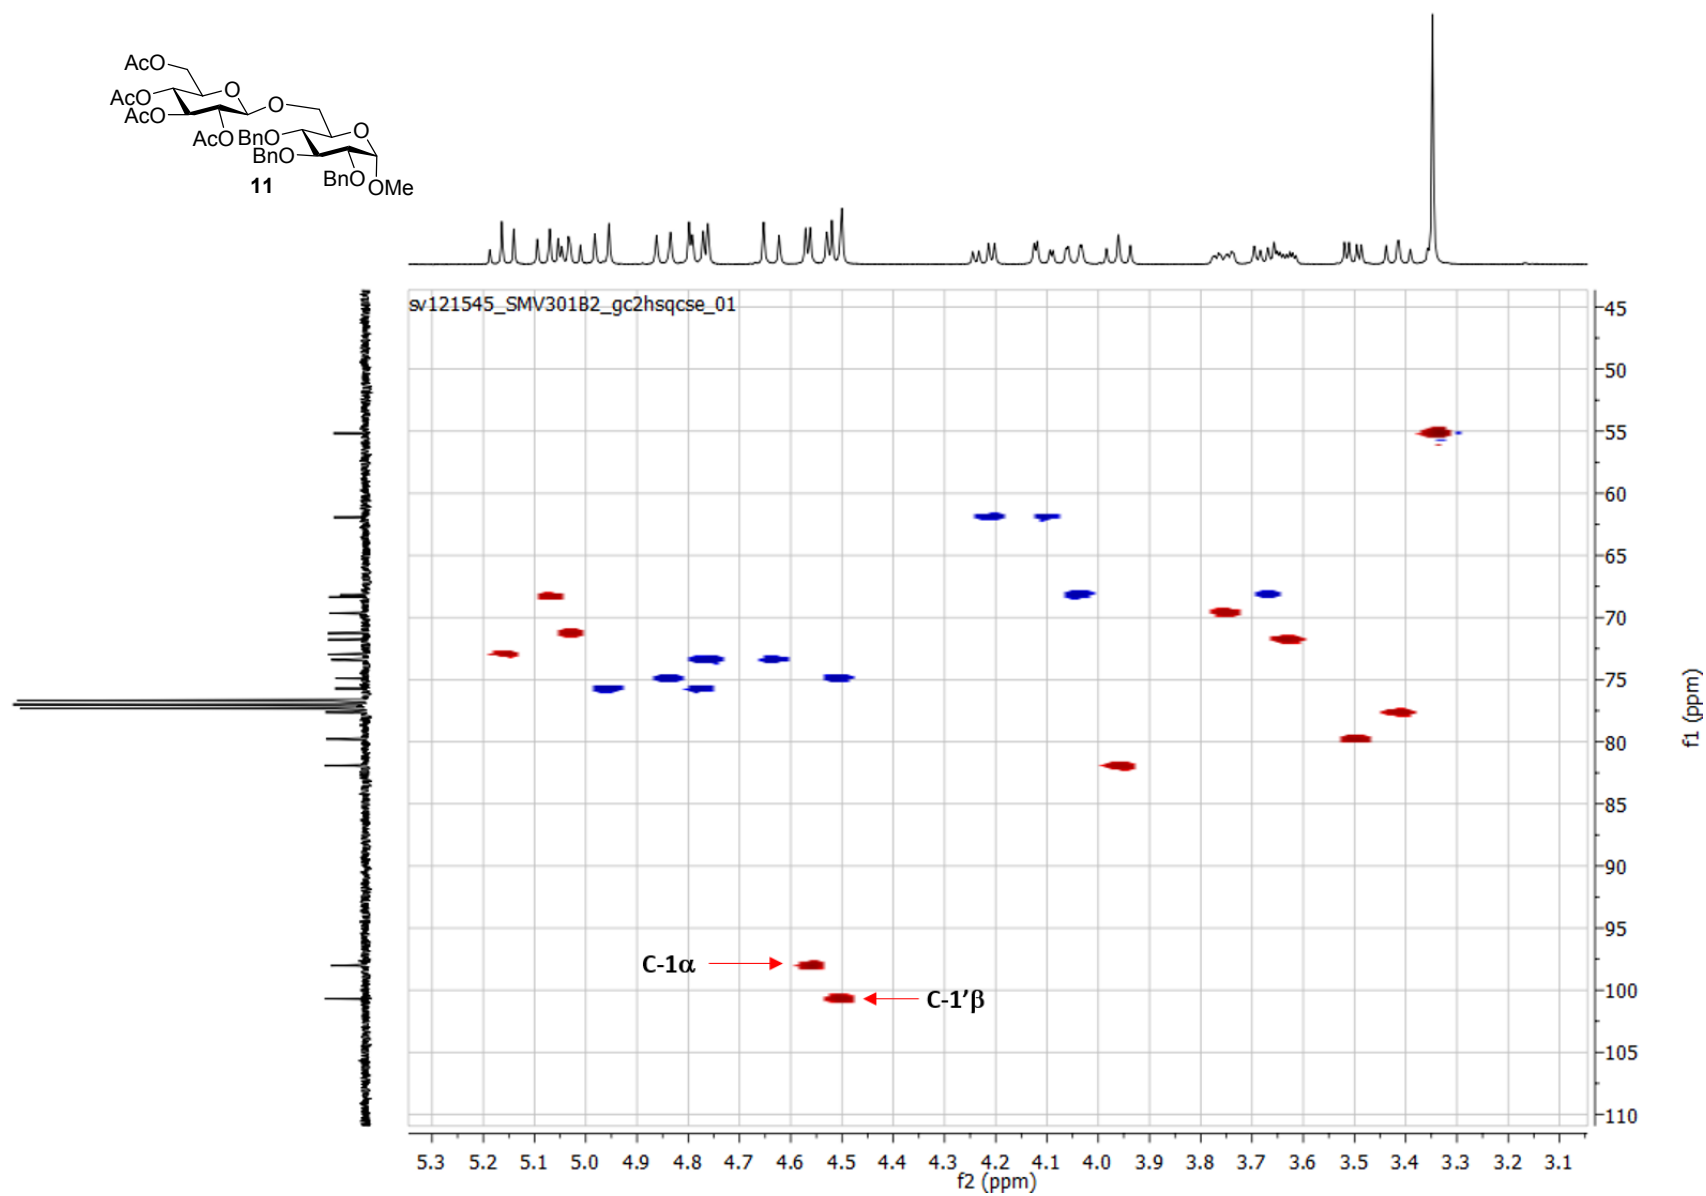

sv77821\_SMV38B\_PROTON\_01

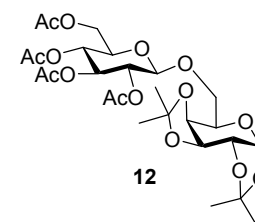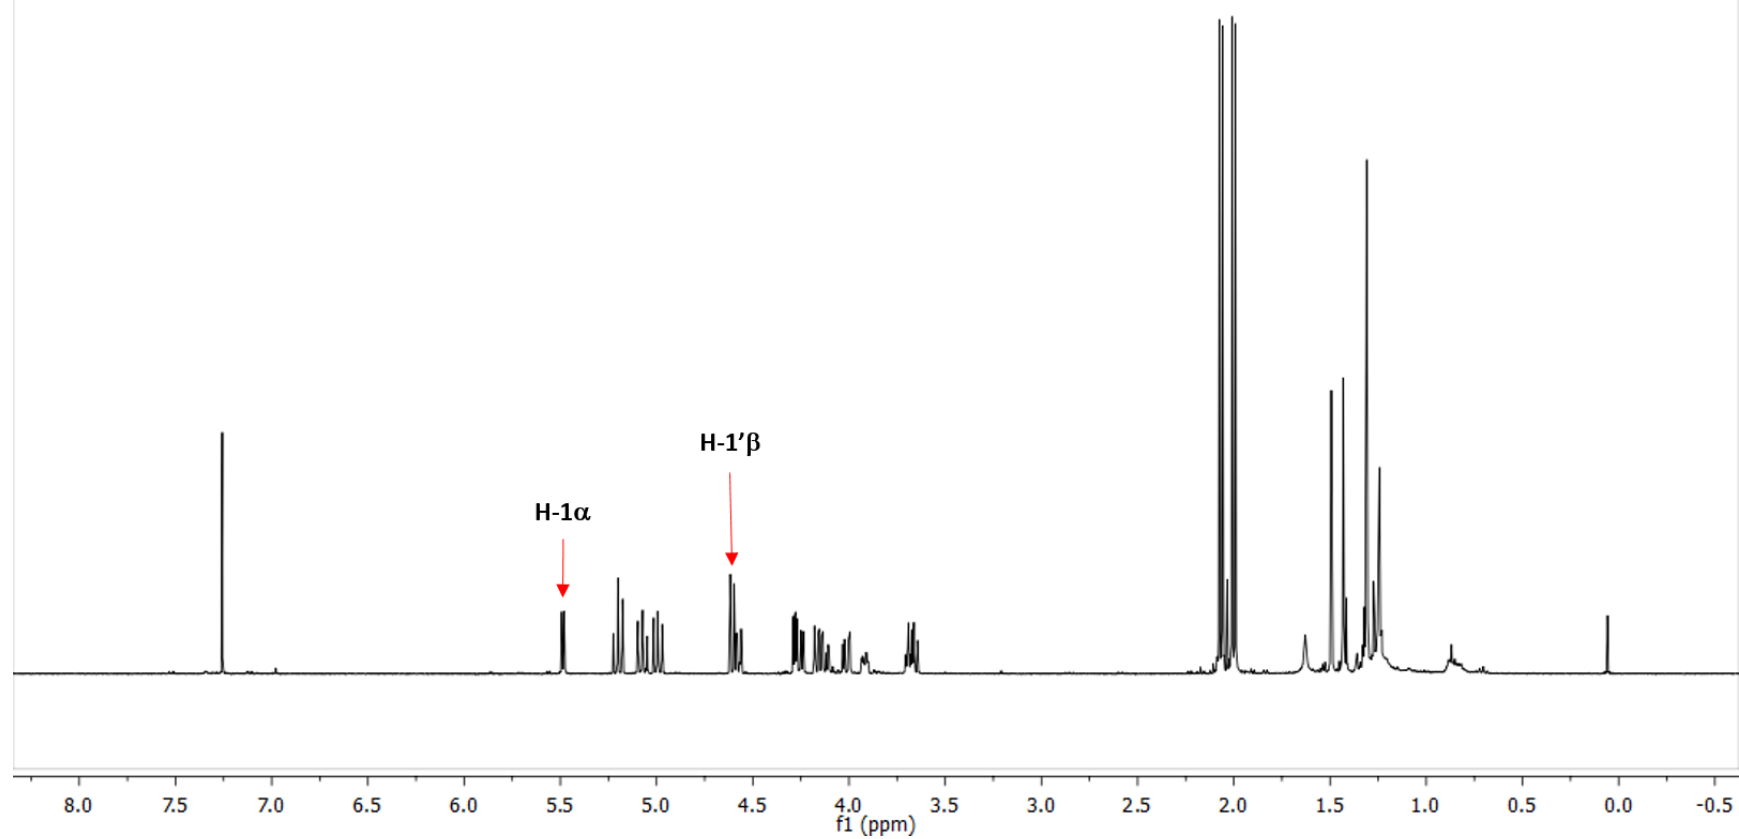

sv77821\_SMV38B\_CARBON\_01

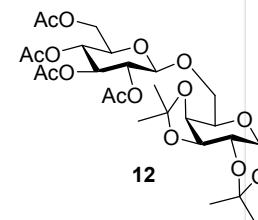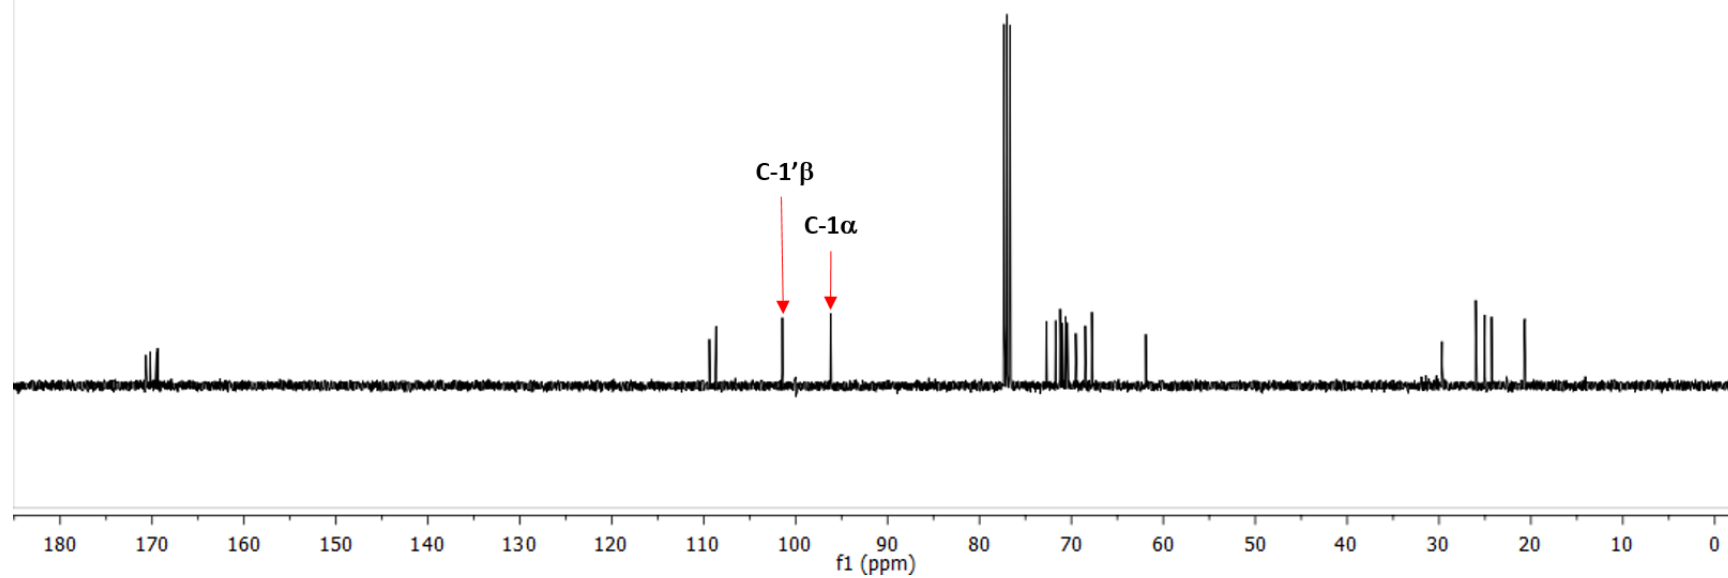

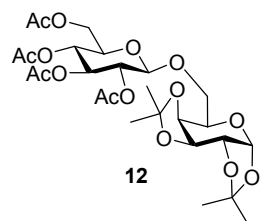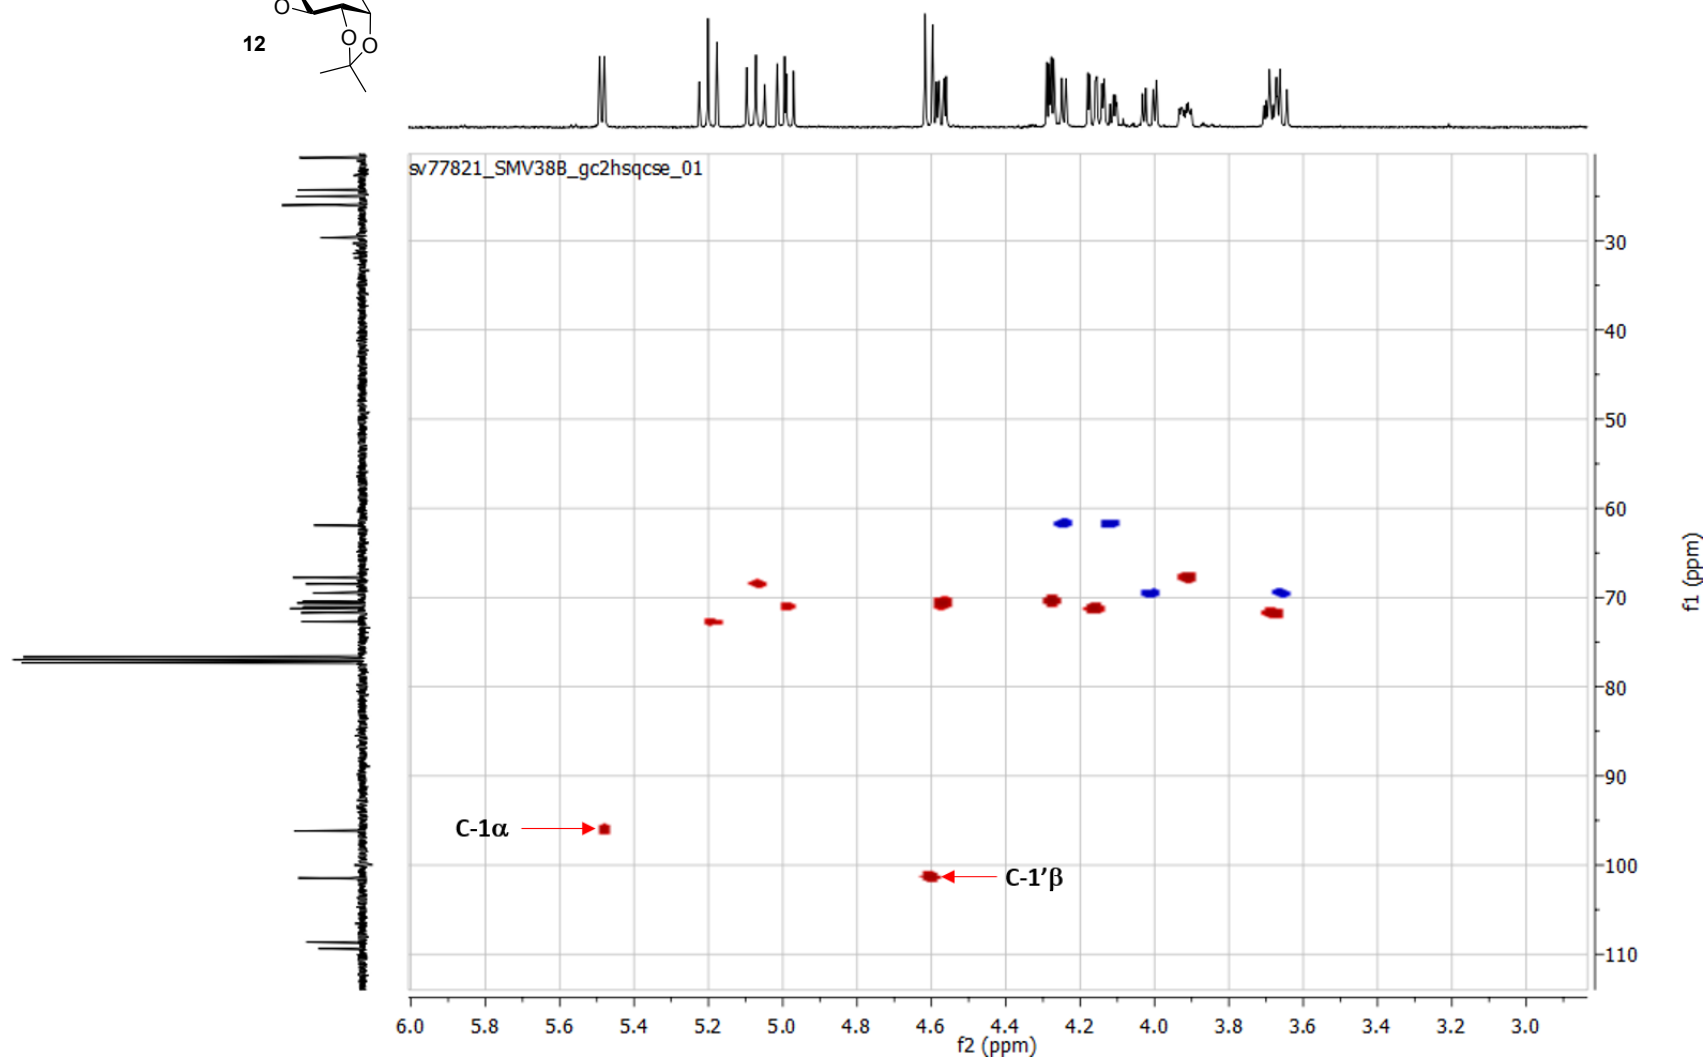

sv120607\_SMV300D\_PROTON\_01

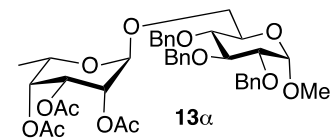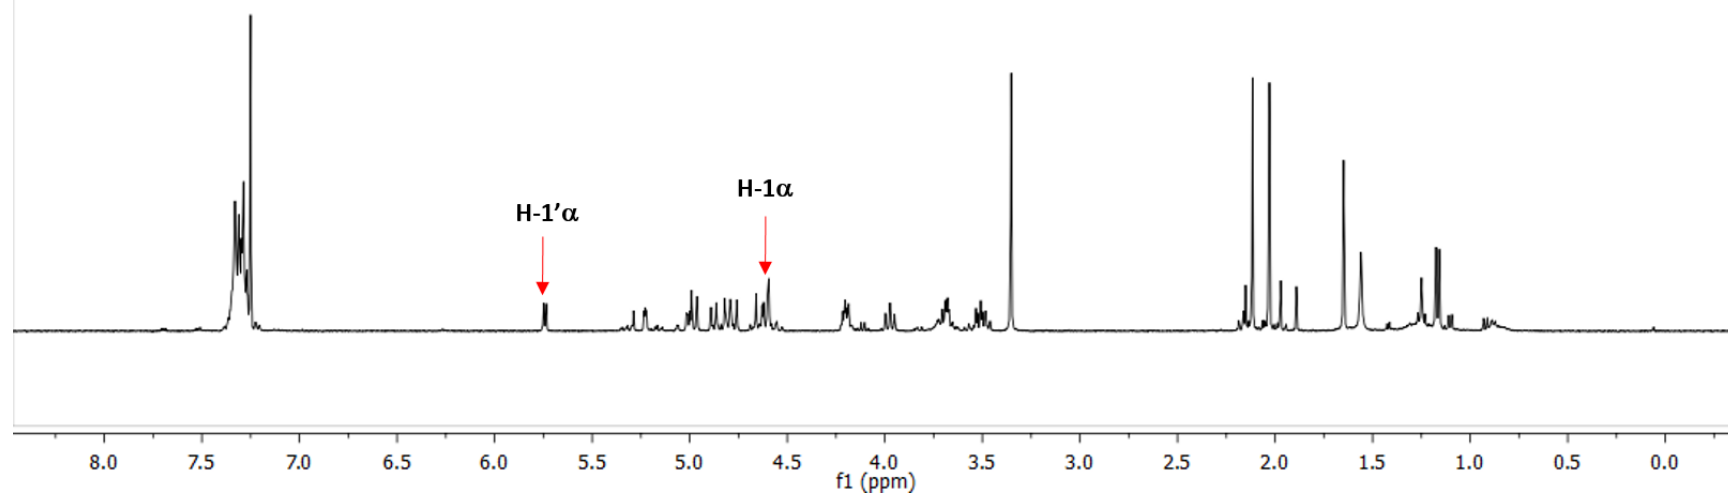

sv19824\_SMV300D\_CARBON\_001

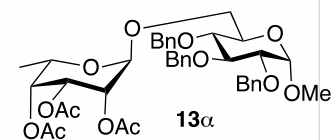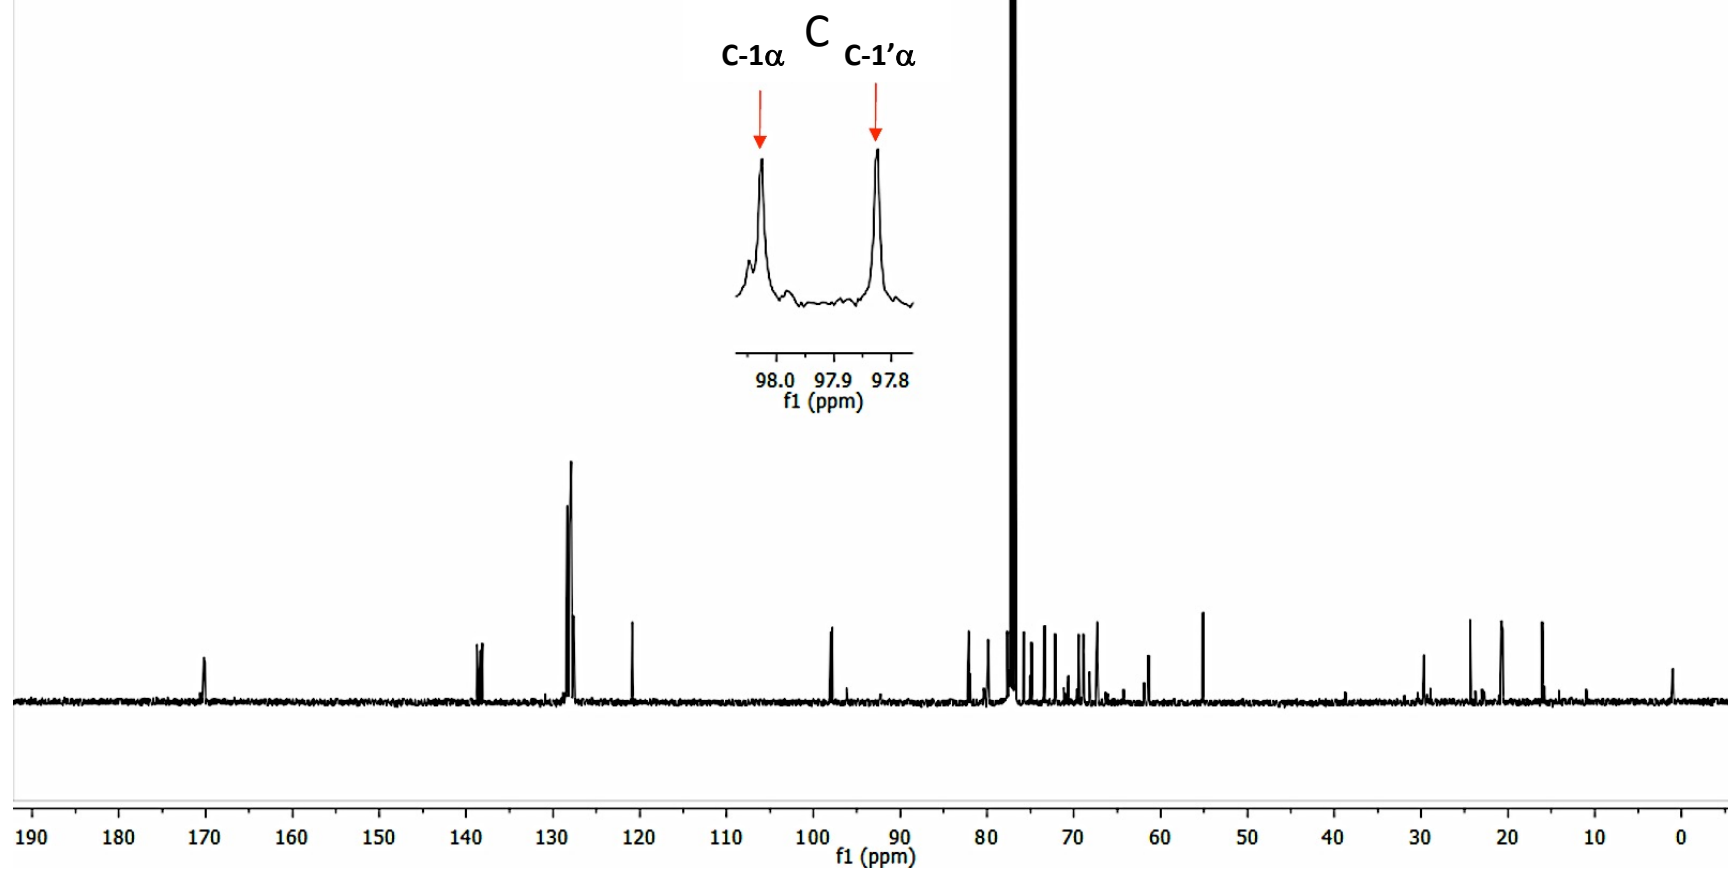

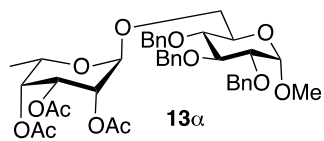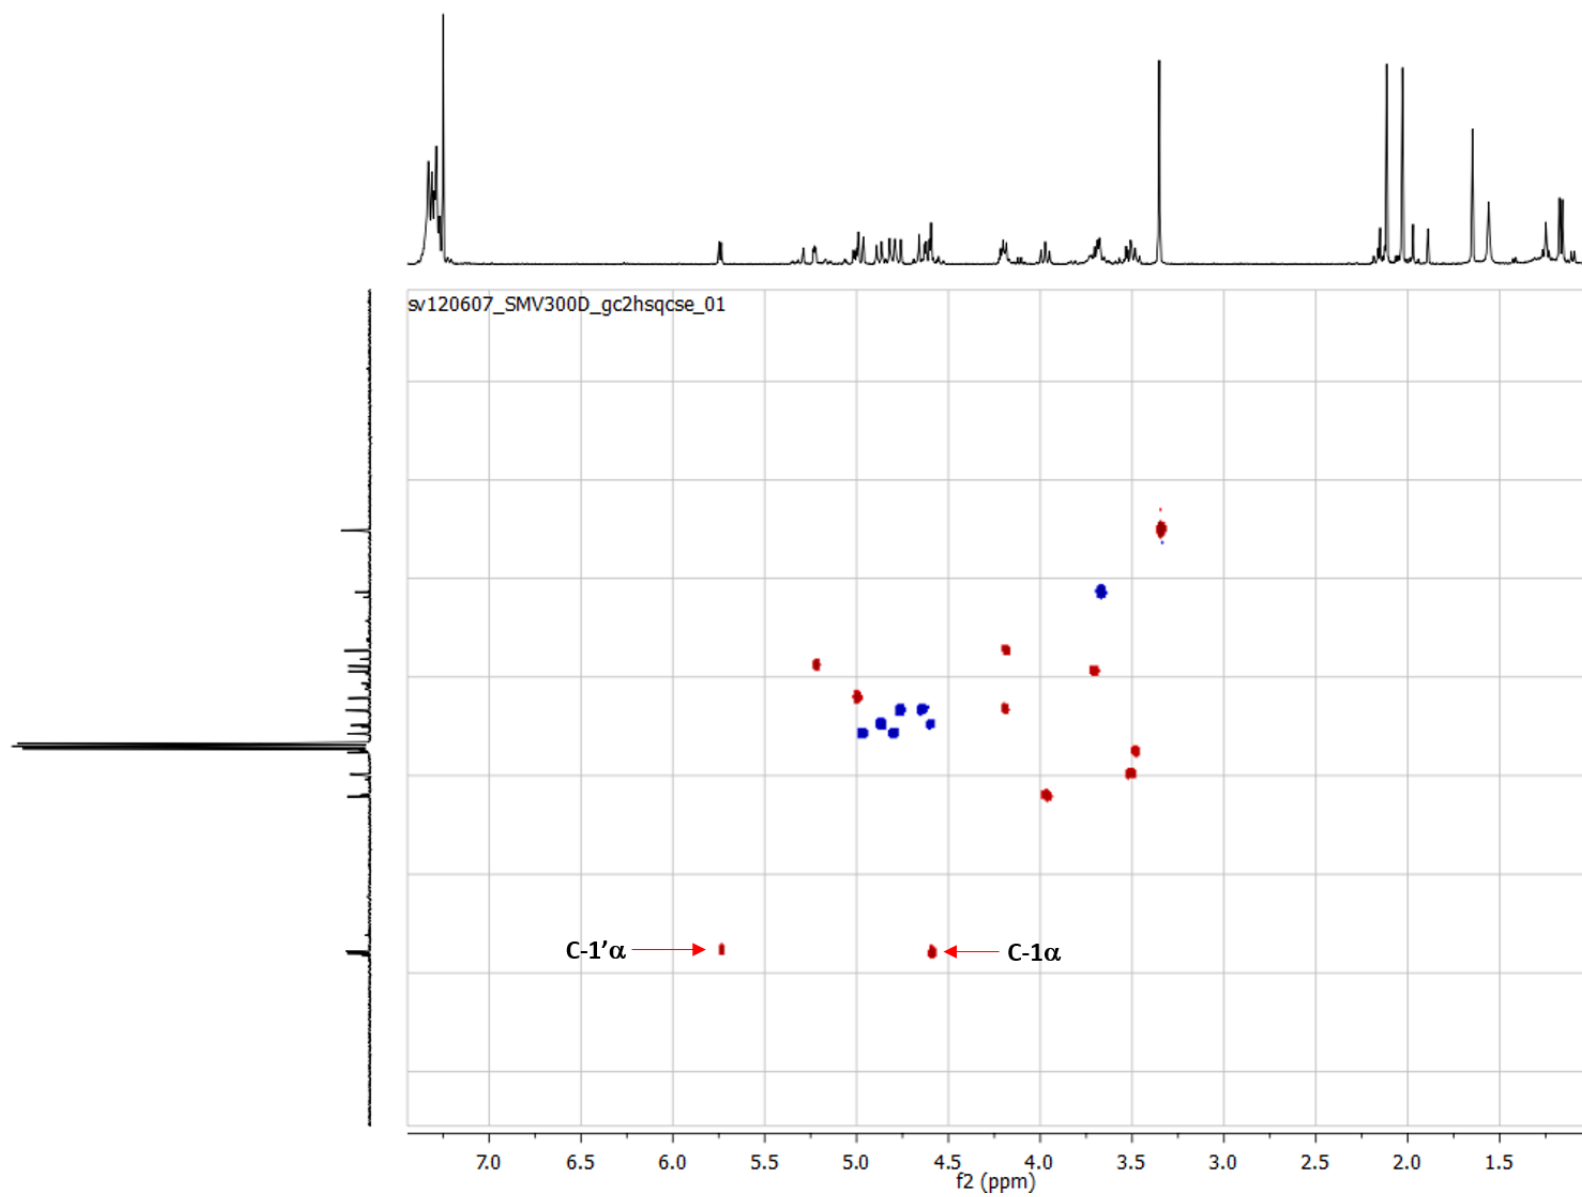

sv120607\_SMV300E\_PROTON\_01

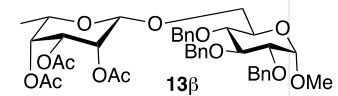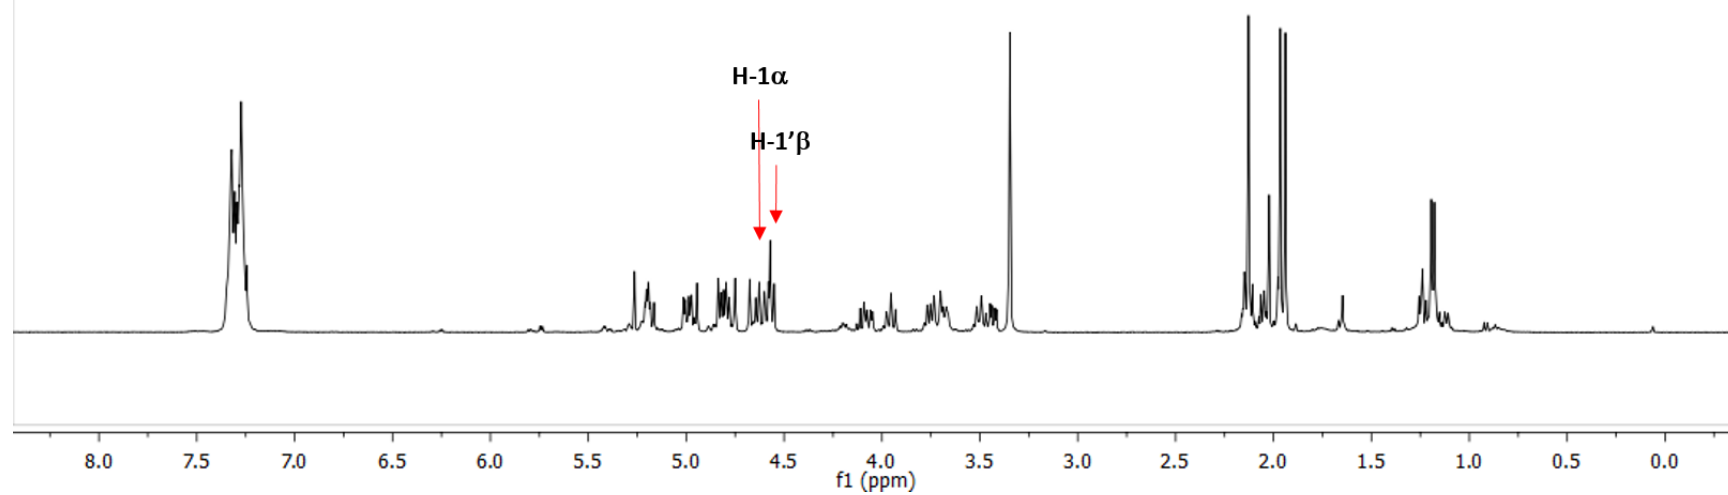



sv121040\_SMV300E\_CARBON\_01

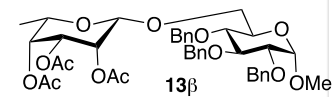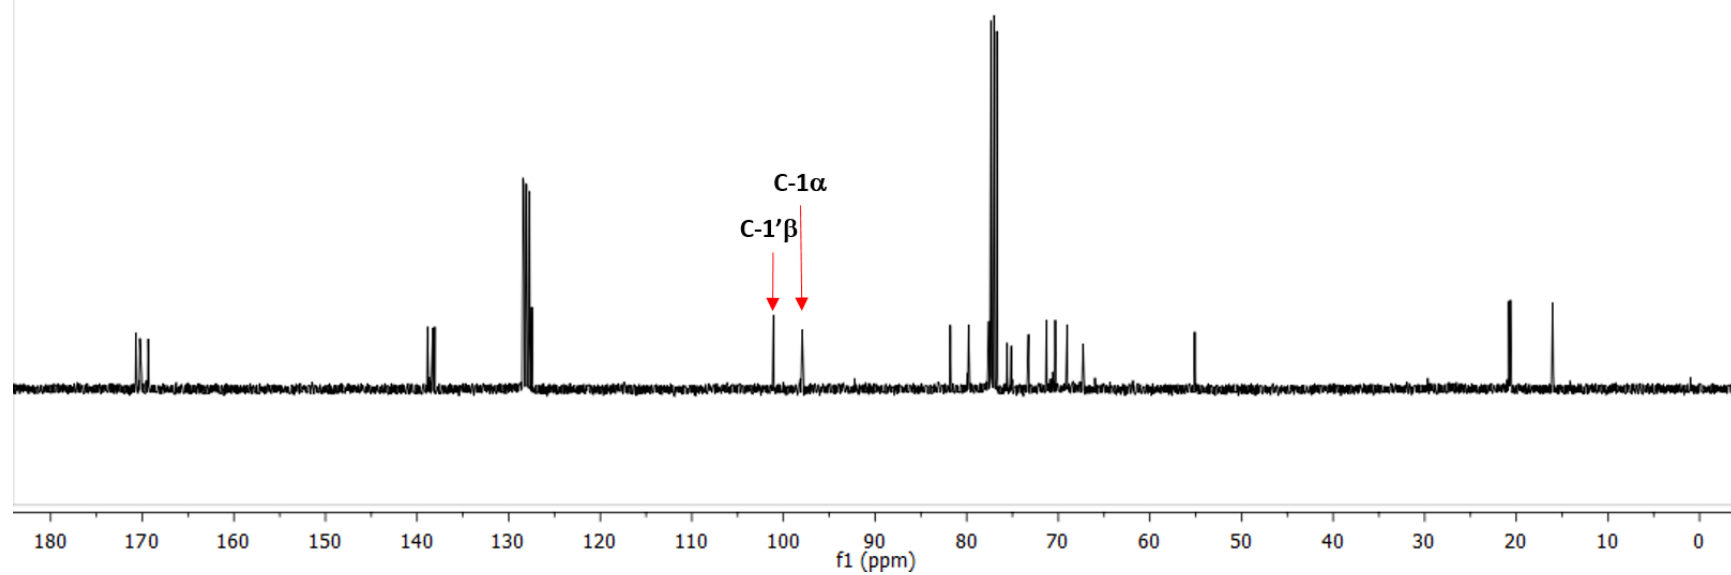

S40

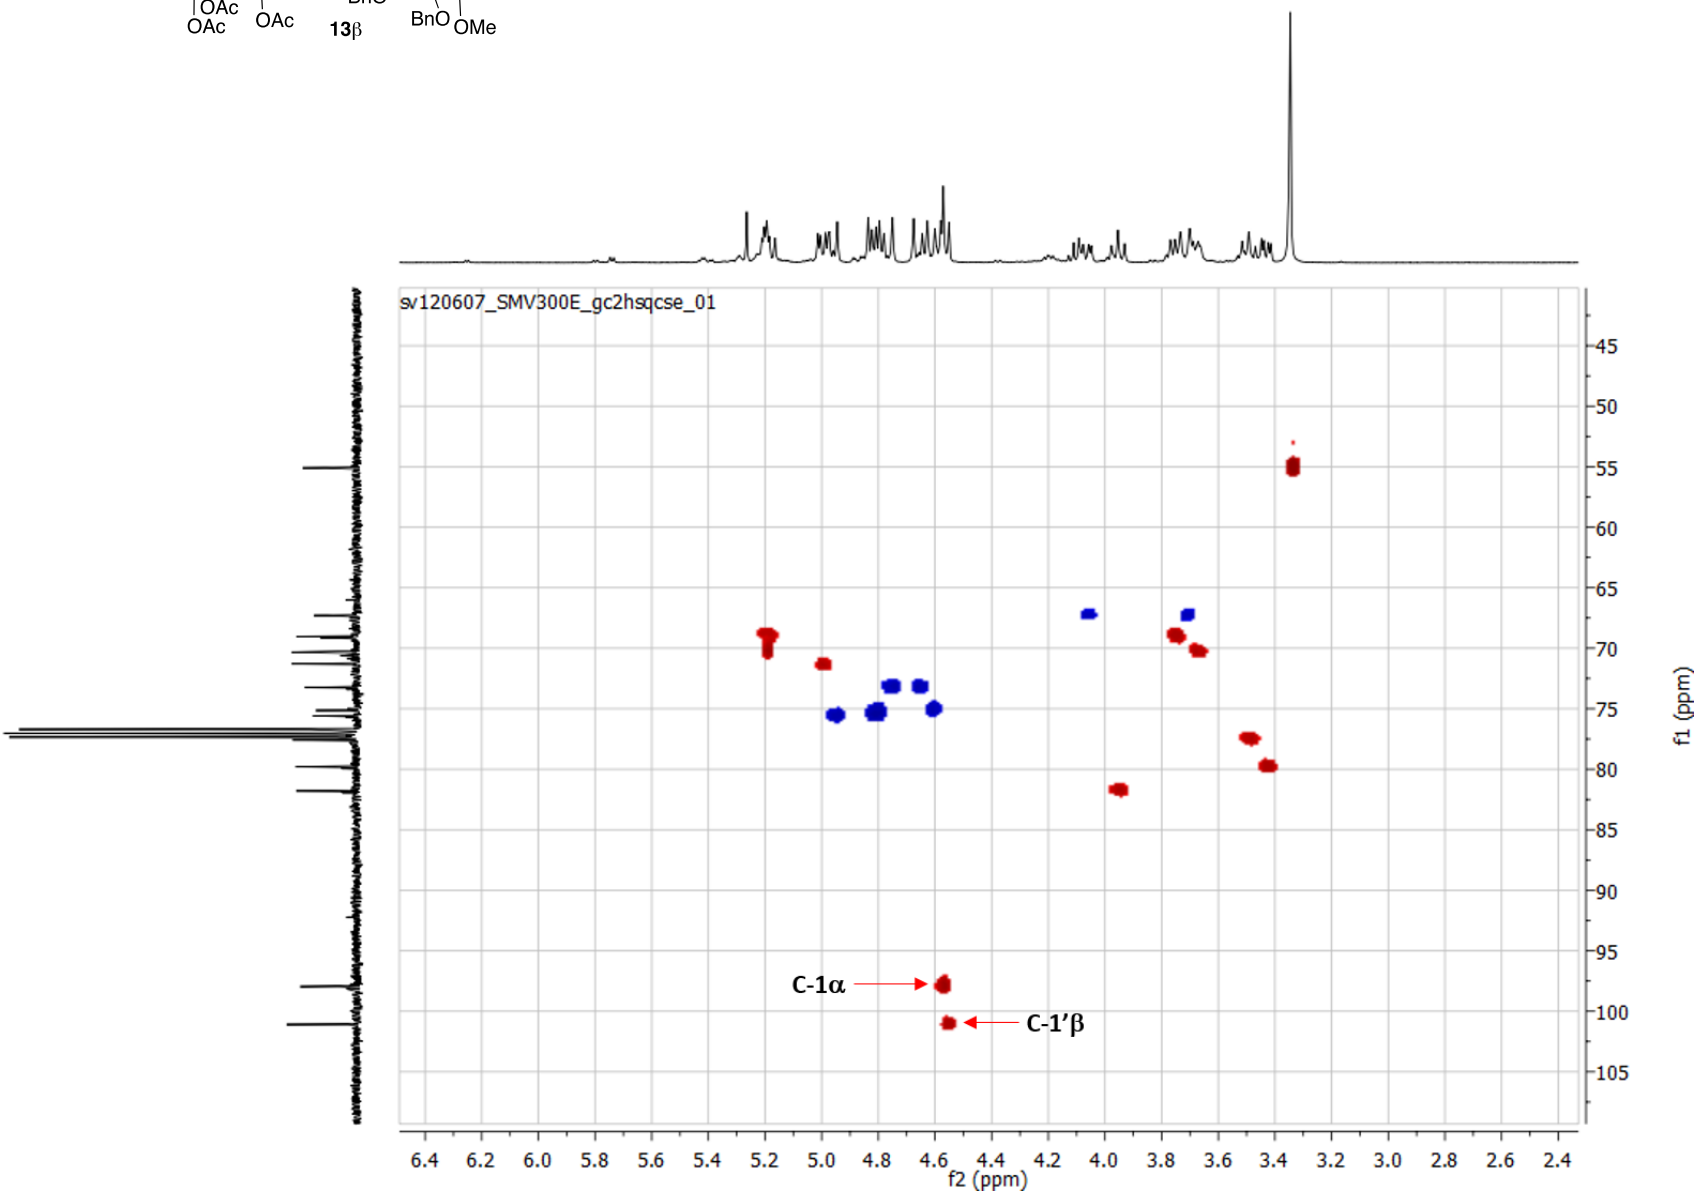

Supplement: c5cc02552d1.pdf [file c5cc02552d1.pdf]
